# Supplementary material for: Pseudo enantiomeric mixed S/P ligands derived from carbohydrates for the 1,4-addition of phenyl boronic acid to cyclohexenone
Source: Royal Society of Chemistry journal article supplement (doi:10.1039/c5ra10181f), 2015-12-14

## **Pseudo Enantiomeric Mixed S/P Ligands Derived from Carbohydrates for the 1,4-Addition of Phenyl Boronic Acid to Cyclohexenone**

By: Victoria Valdivia,<sup>a,b</sup> Nerea Bilbao Bustinza,<sup>a</sup> Juan Francisco Moya,<sup>a</sup> Álvaro Salvador,<sup>a</sup> Inmaculada Fernández,<sup>\*b</sup> and Nouredine Khiar.<sup>\*a</sup>

<sup>a</sup> Asymmetric Synthesis and Functional Nanosystem Group *Instituto de Investigaciones Químicas, C.S.I.C-Universidad de Sevilla, c/. Américo Vespucio, 49., Isla de la Cartuja, 41092 Sevilla, Spain. Fax:+34954460565; Tel: +34954489559; E-mail: [khlar@iiq.csic.es](mailto:khlar@iiq.csic.es)*

<sup>b</sup>*Departamento de Química Orgánica y Farmacéutica, Facultad de Farmacia, Universidad de Sevilla, 41012 Sevilla, Spain; E-mail: [inmaff@us.es](mailto:inmaff@us.es)*

## Table of contents

|                        |       |
|------------------------|-------|
| TOC                    | SI-2  |
| NMR Spectra collection | SI-3  |
| HPLC Chromatograms     | SI-21 |

<sup>1</sup>H-NMR 500 MHz

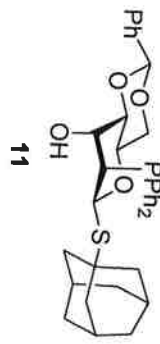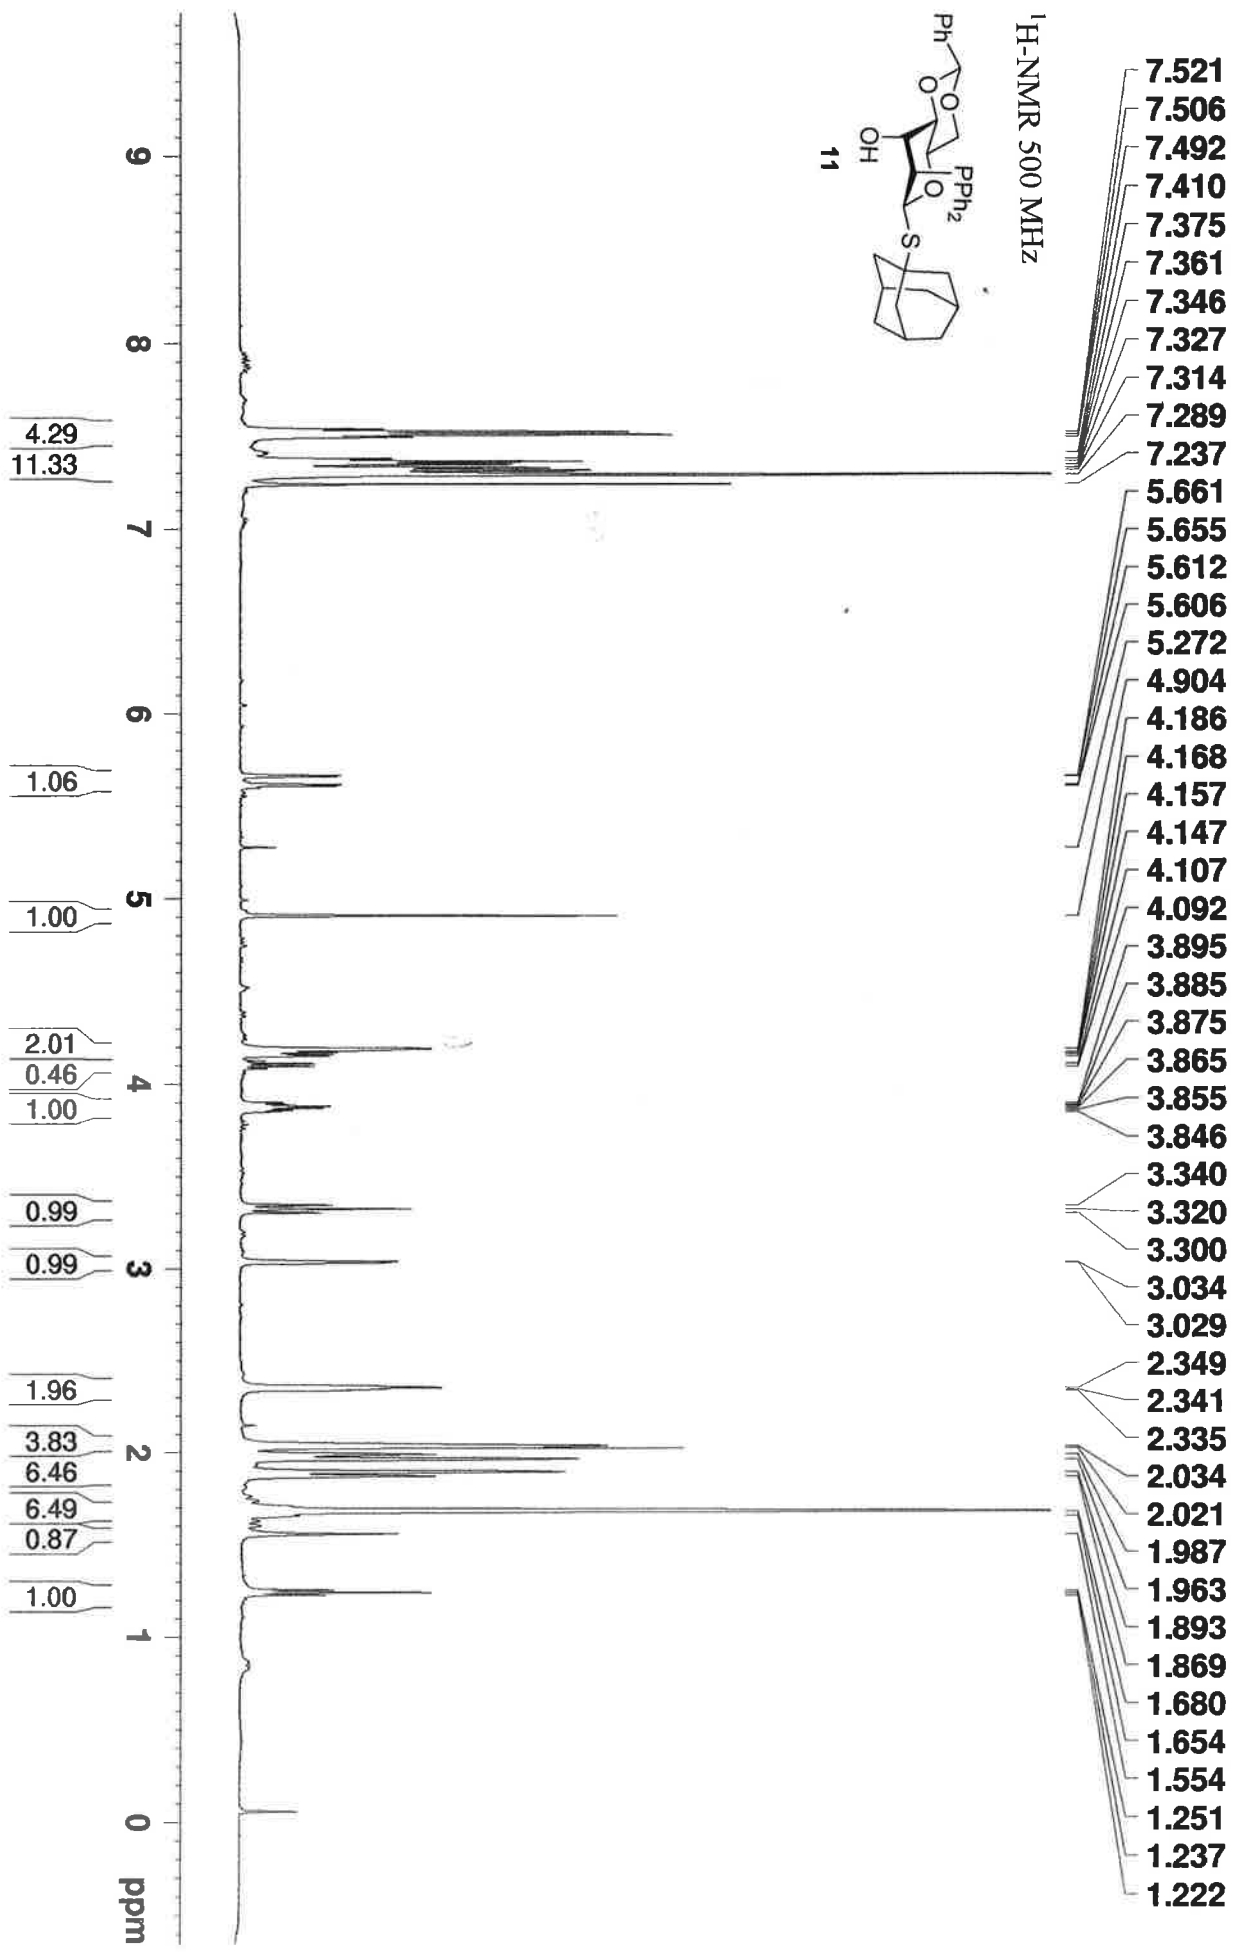

$^{13}\text{C-NMR}$  125 MHz

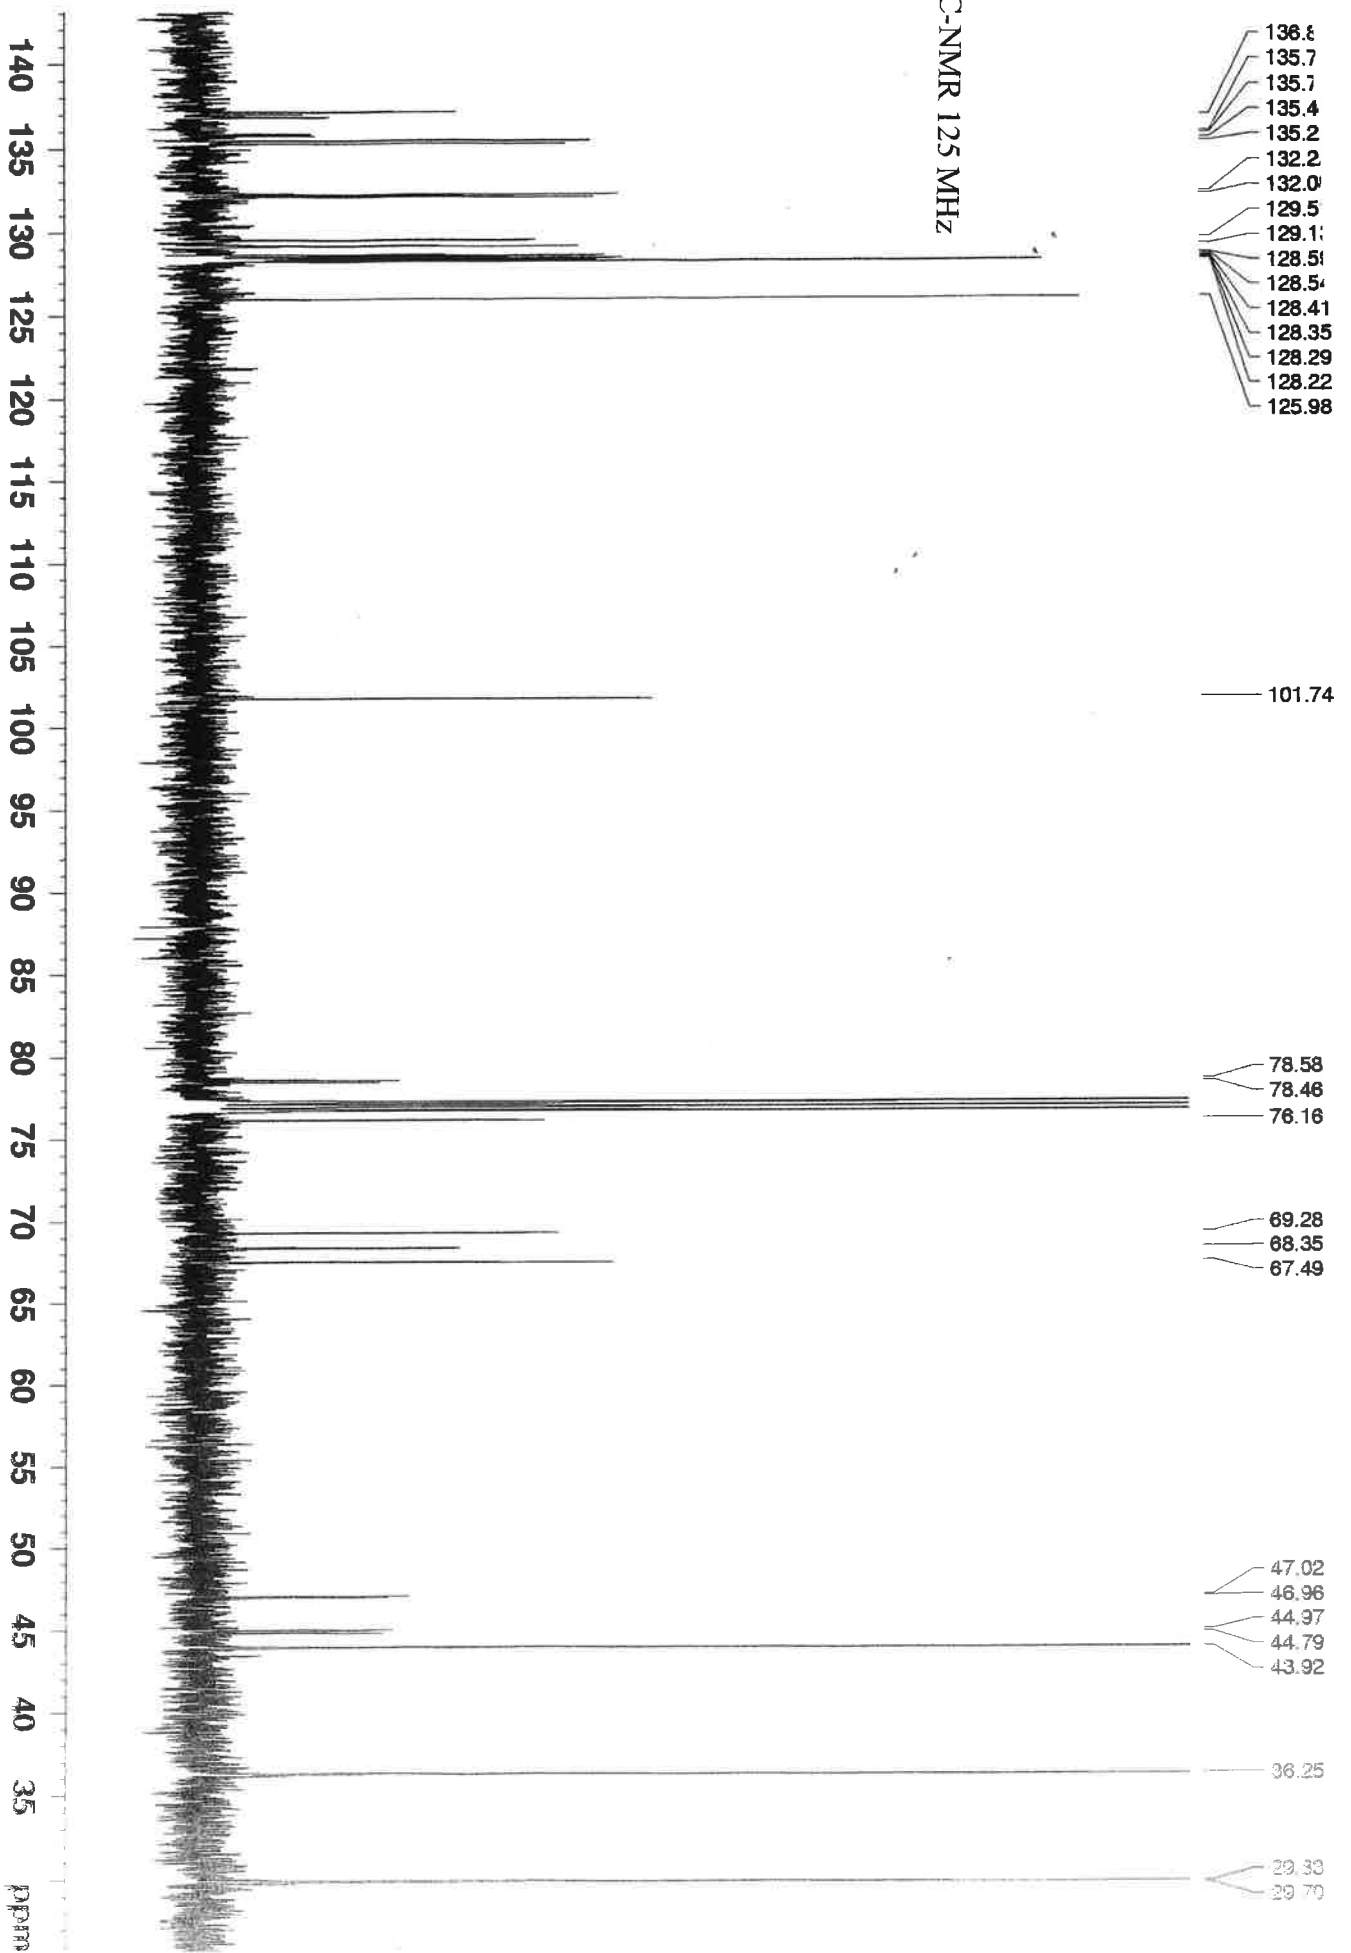

$^{31}\text{P}$ -NMR 121.4 MHz

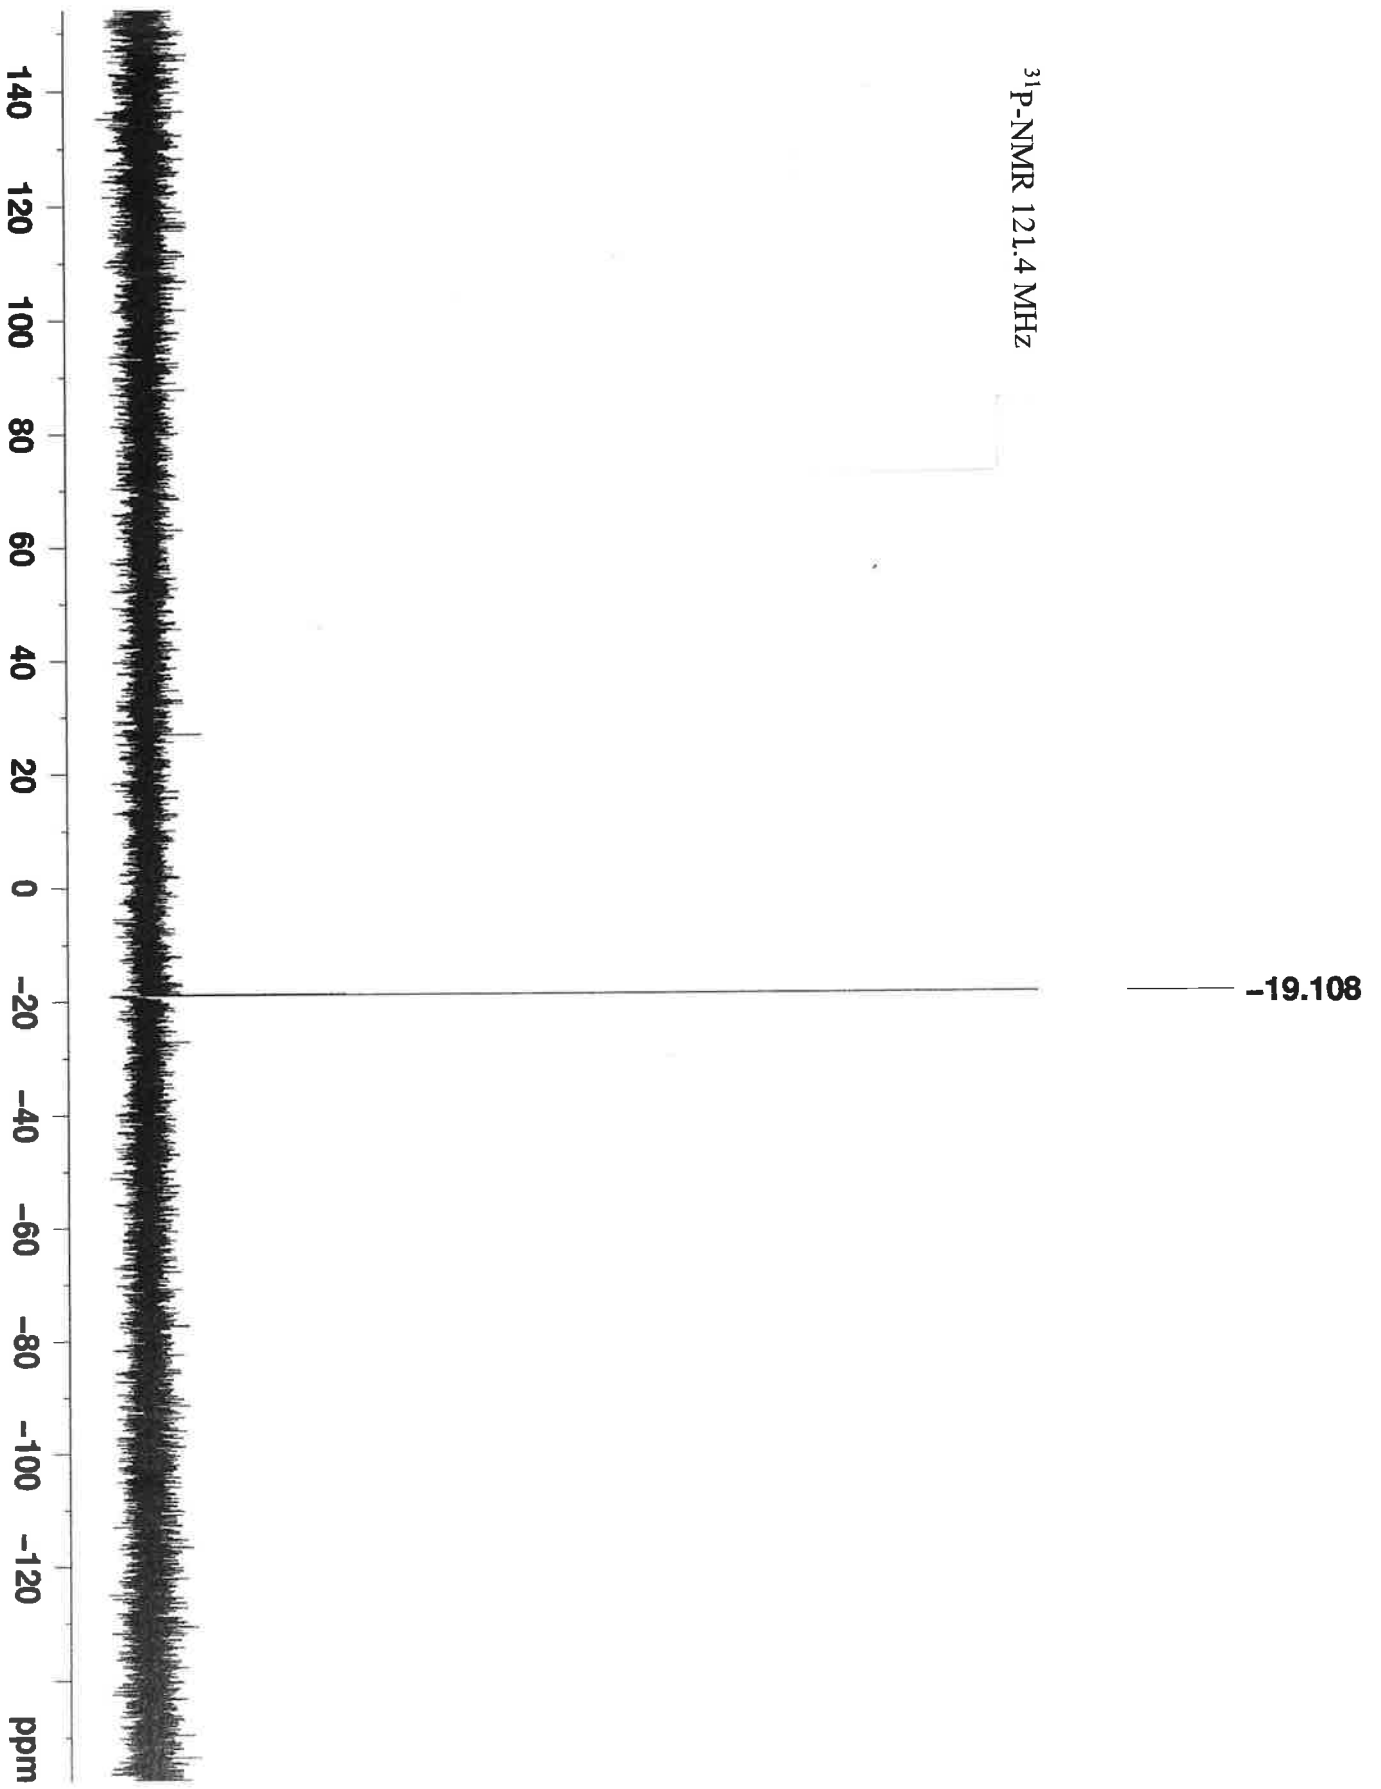

<sup>1</sup>H-NMR 500 MHz

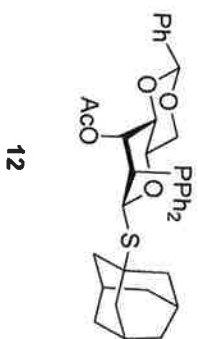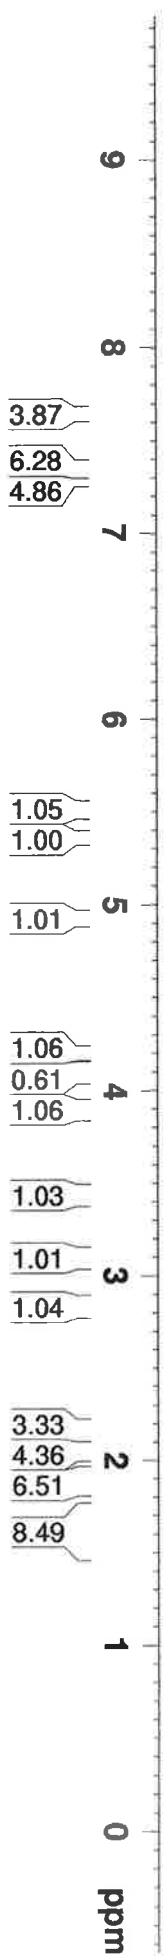

$^{31}\text{P}$ -NMR 121.4 MHz

-18.160

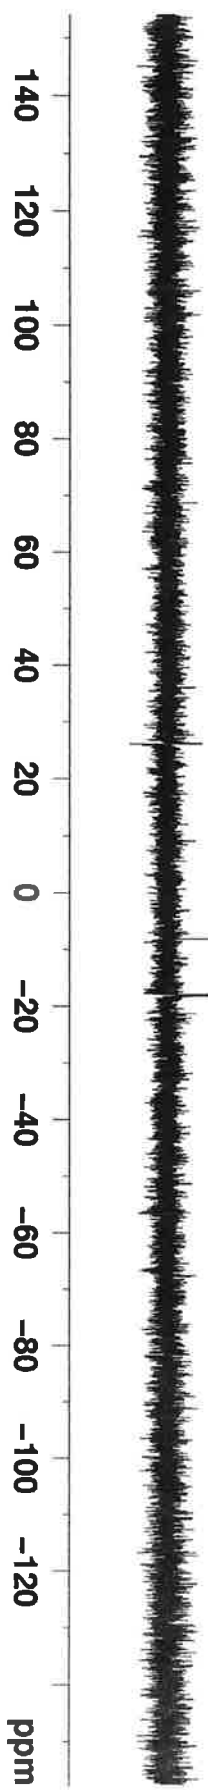

<sup>1</sup>H-NMR 500 MHz

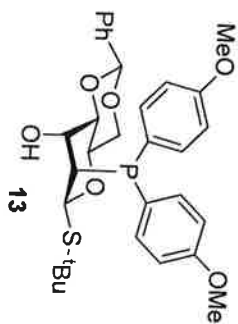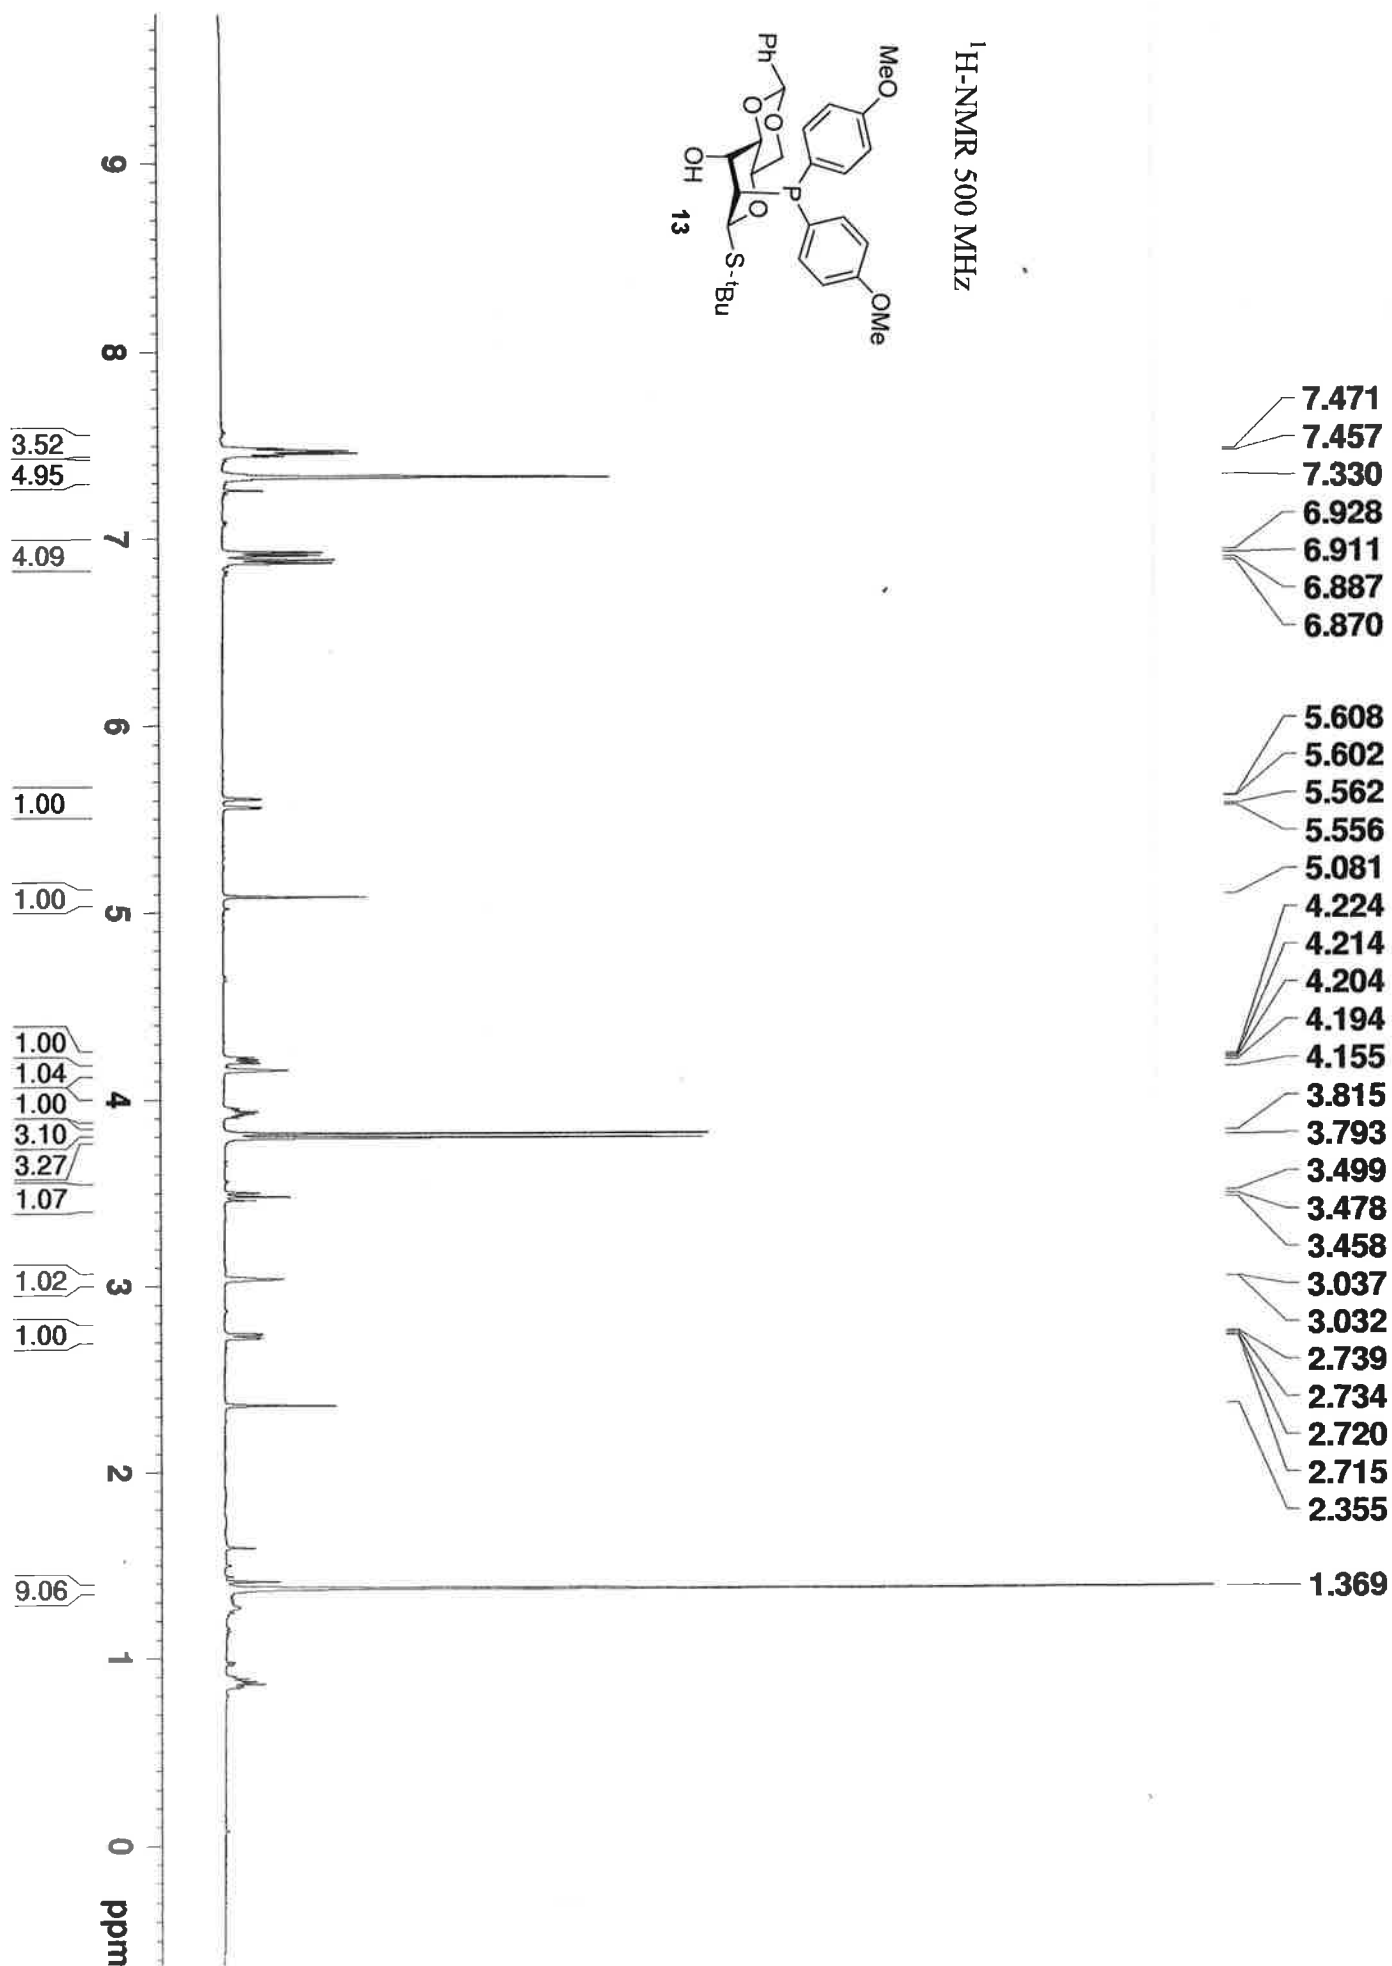



<sup>13</sup>C-NMR 125 MHz

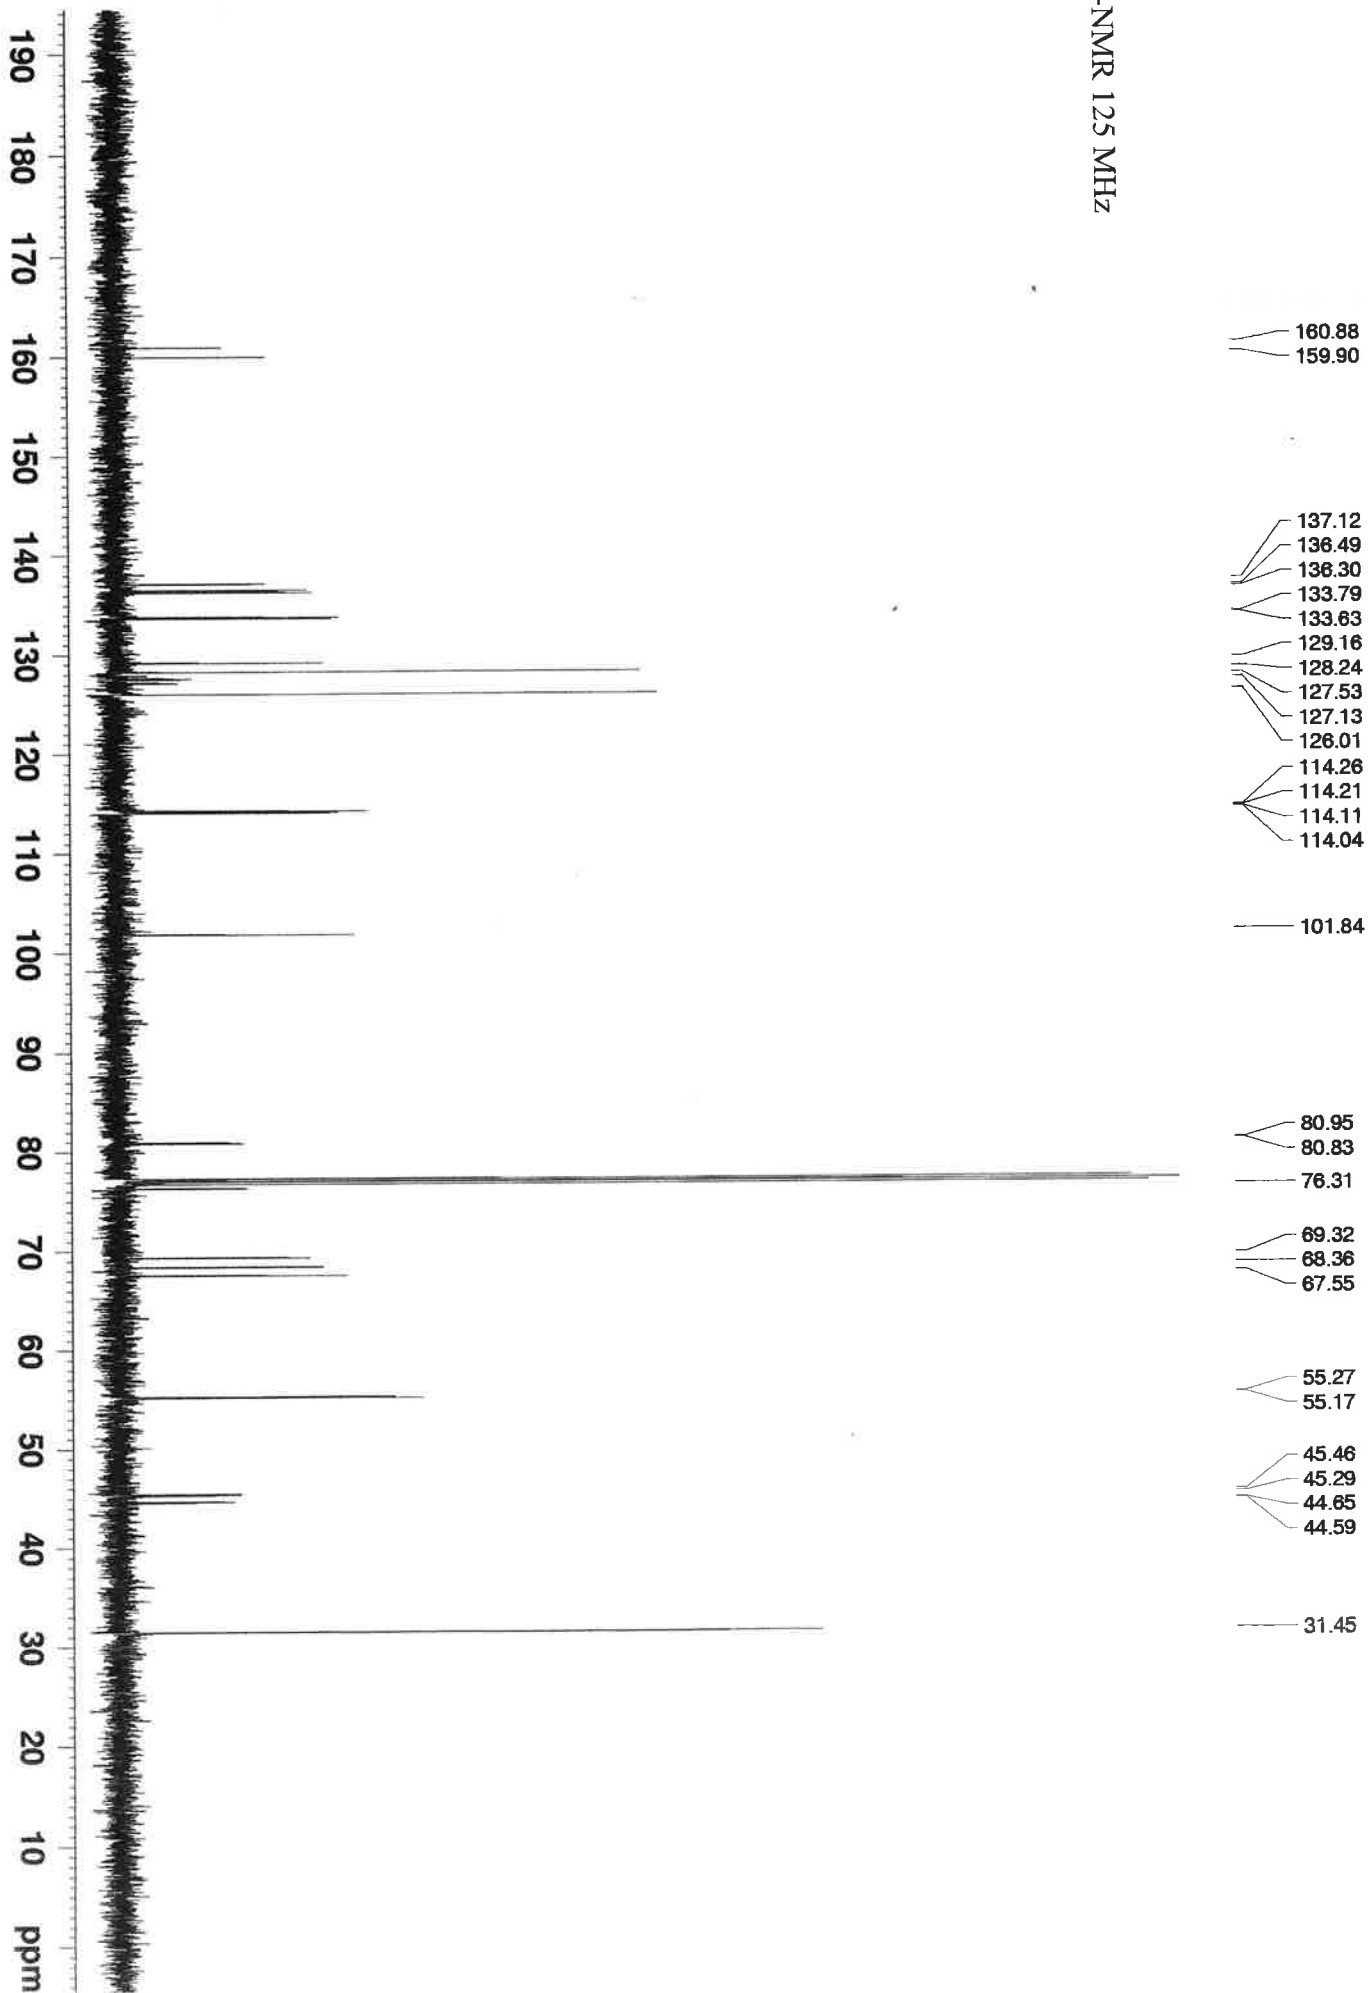

$^{31}\text{P}$ -NMR 121.4 MHz

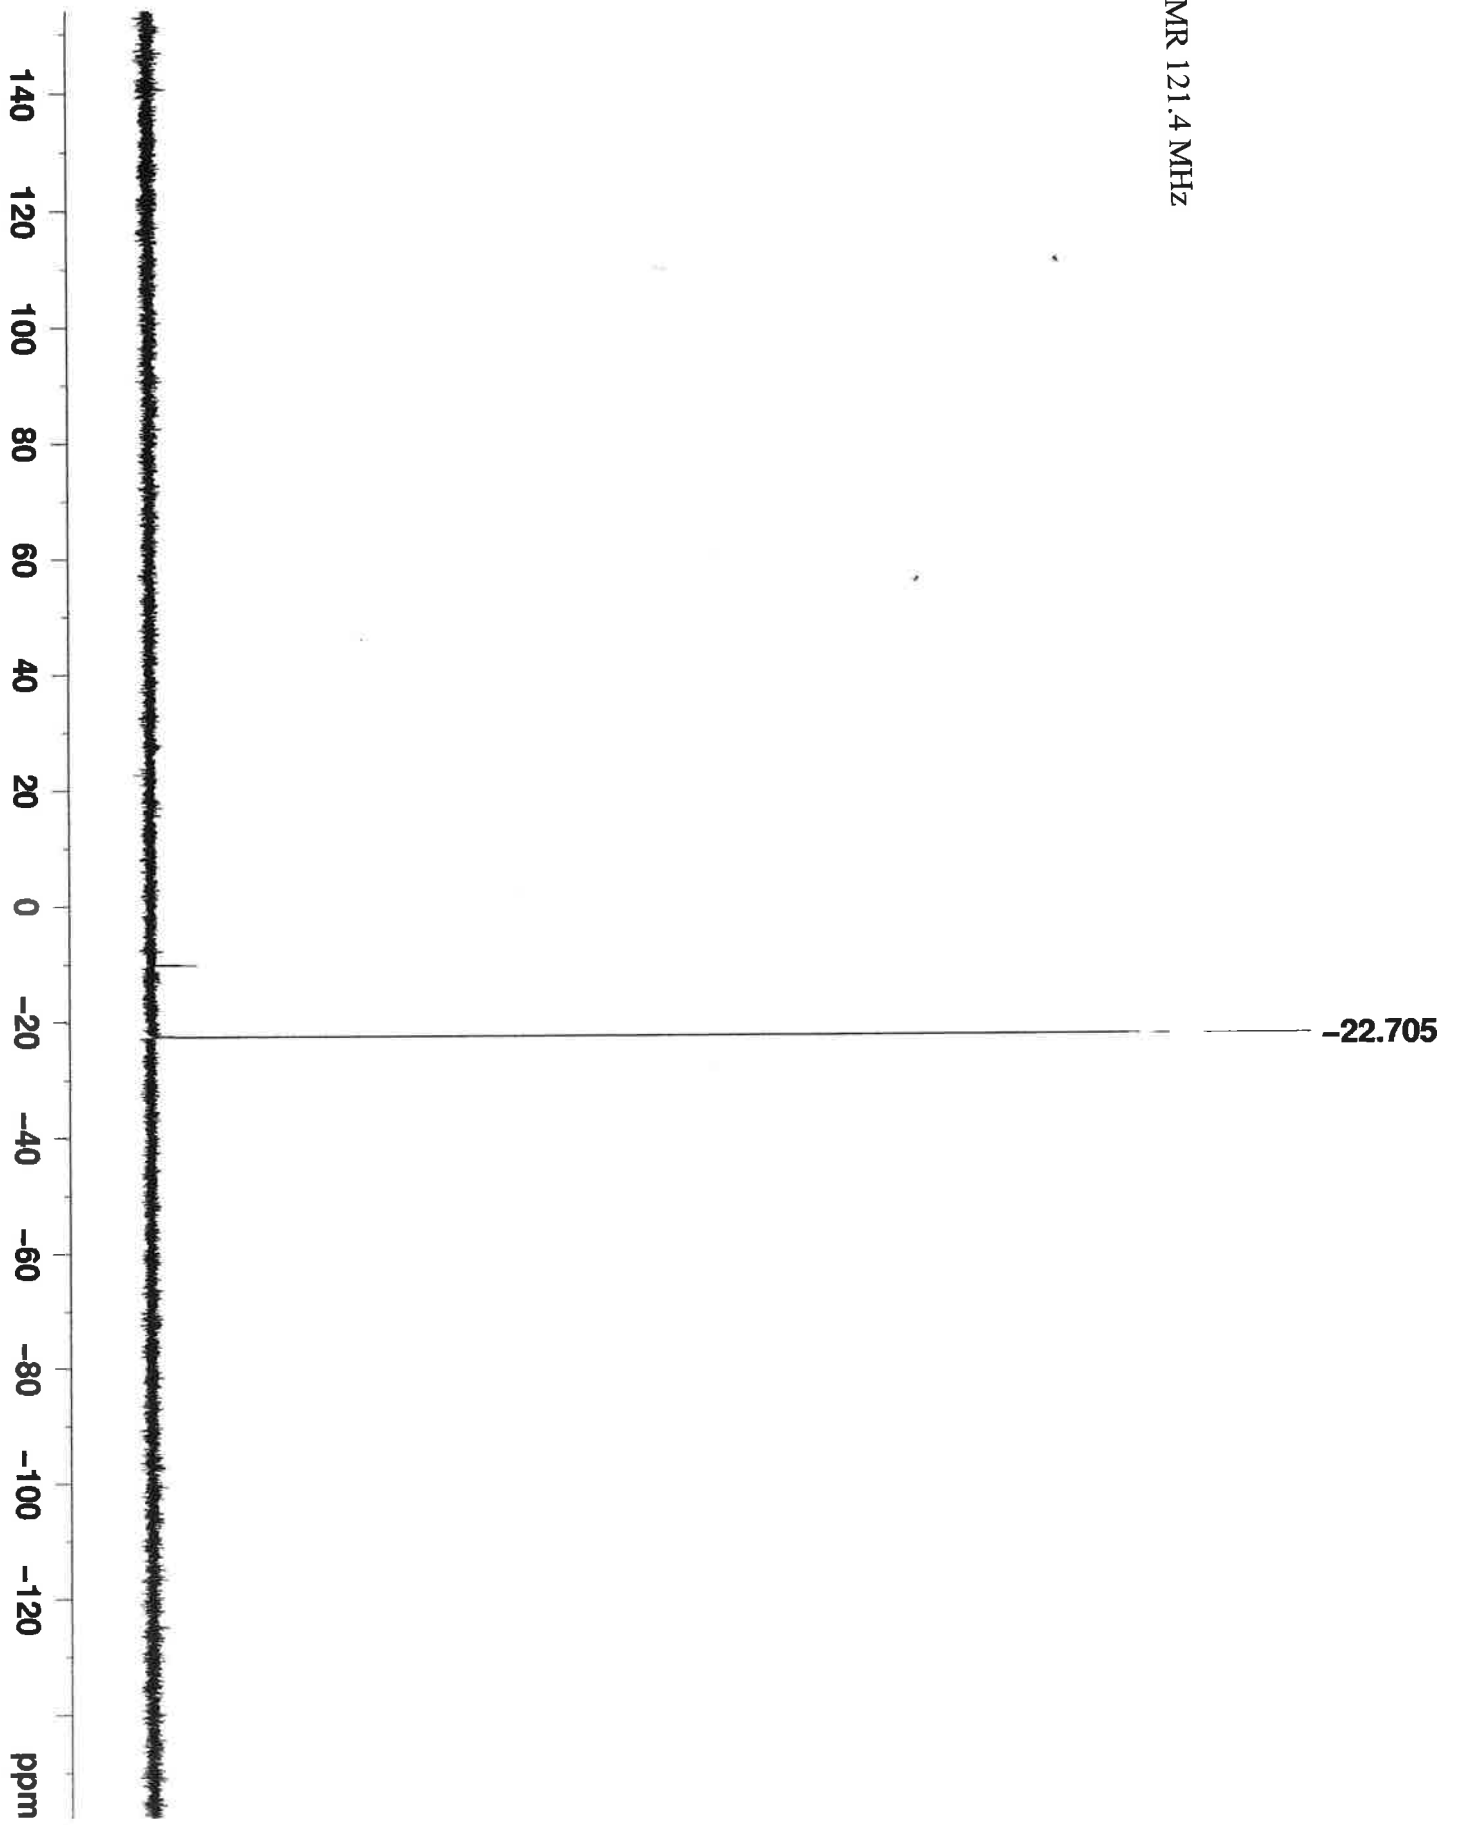

<sup>1</sup>H-NMR 500 MHz

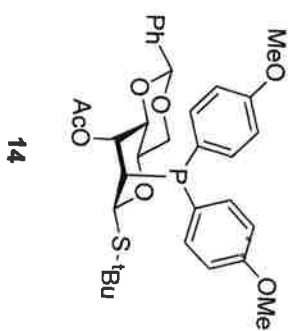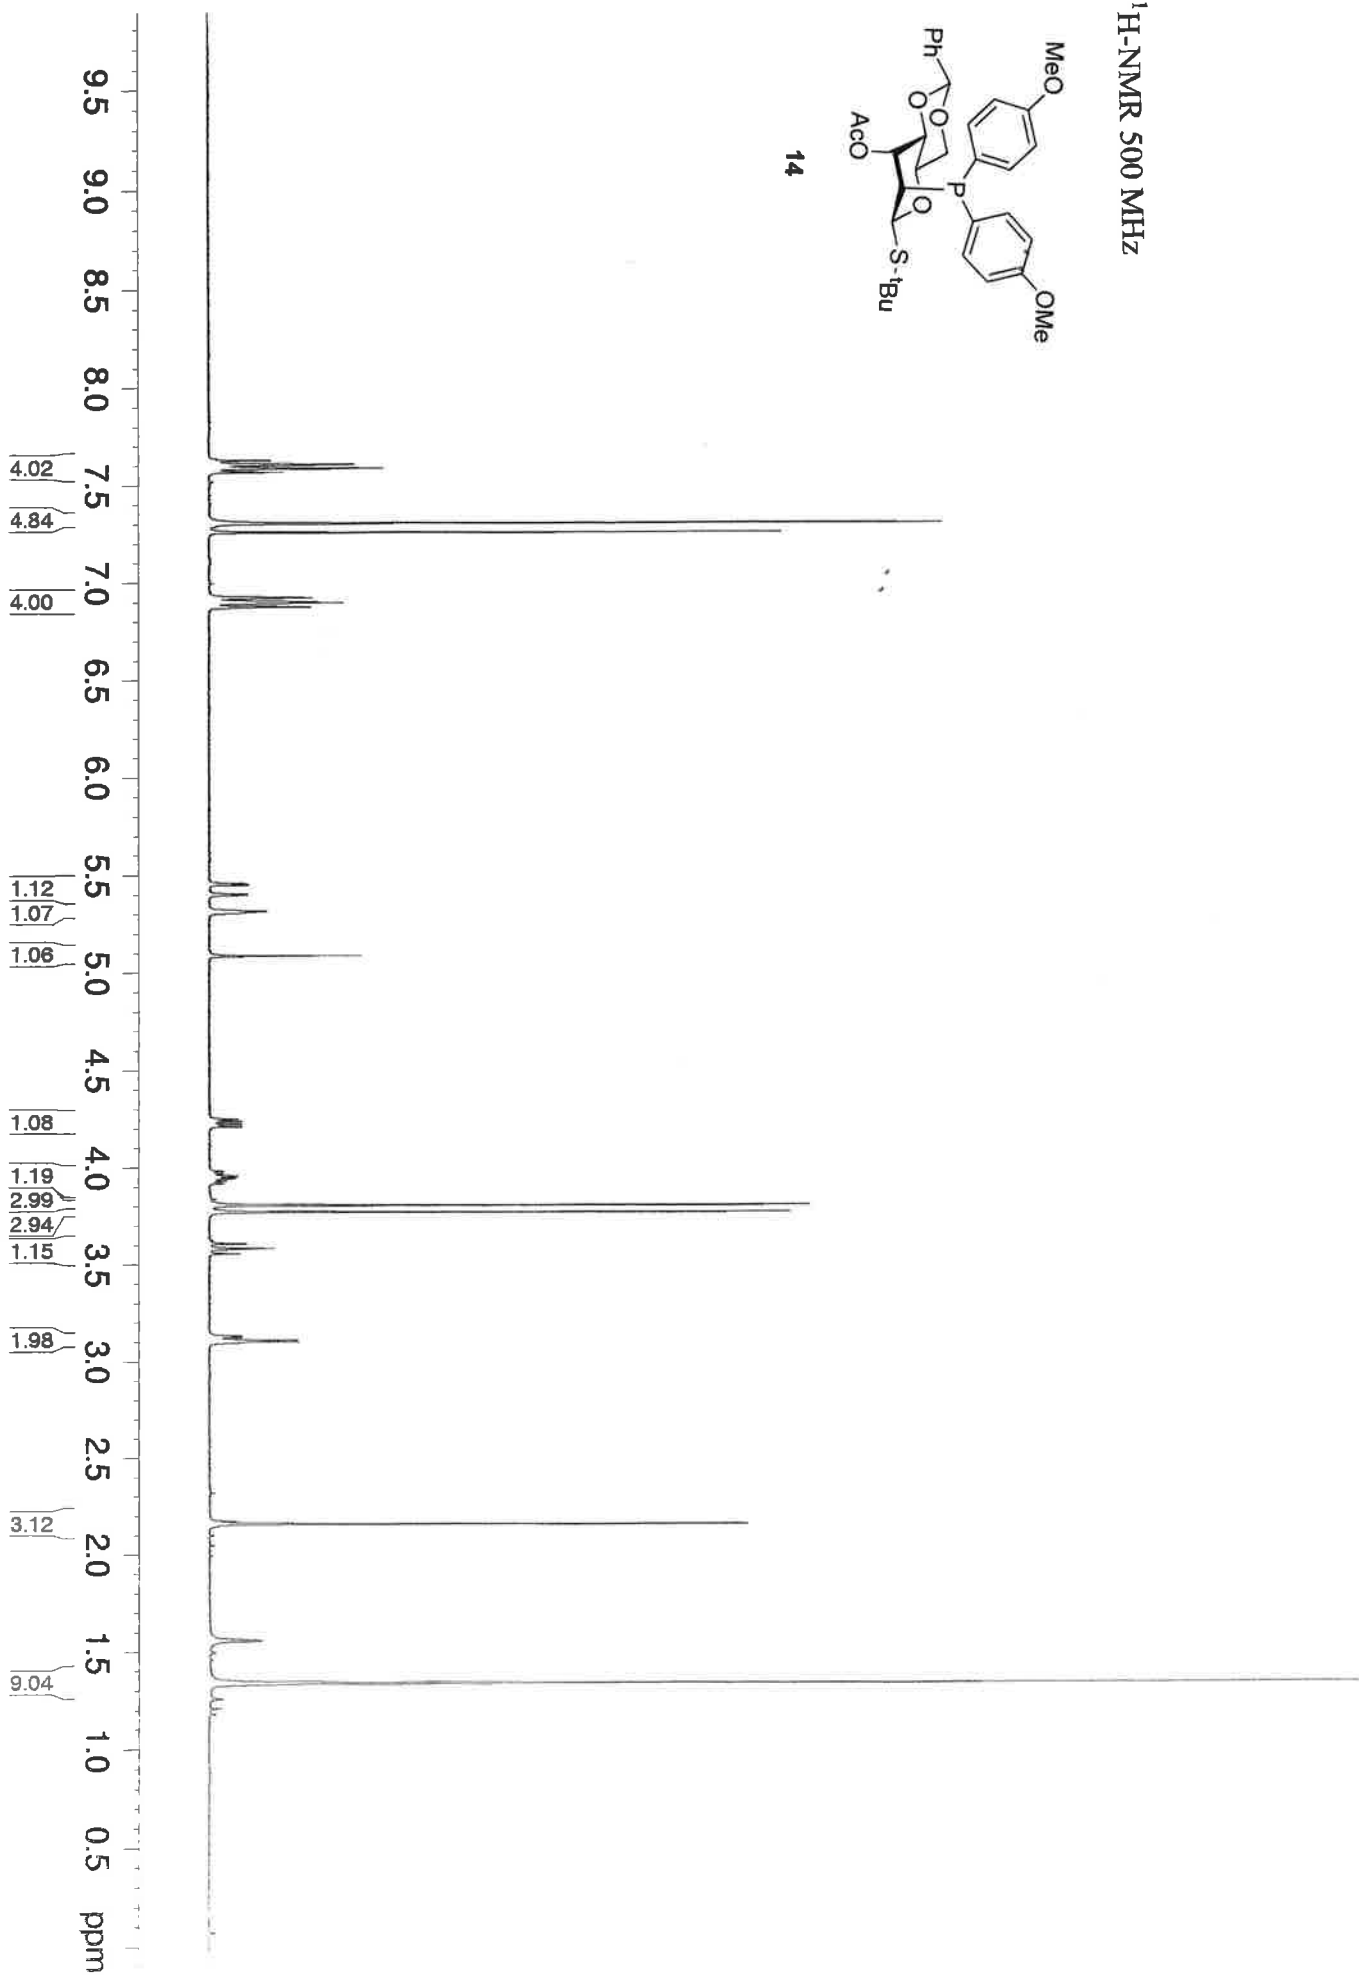

<sup>13</sup>C-NMR 125 MHz

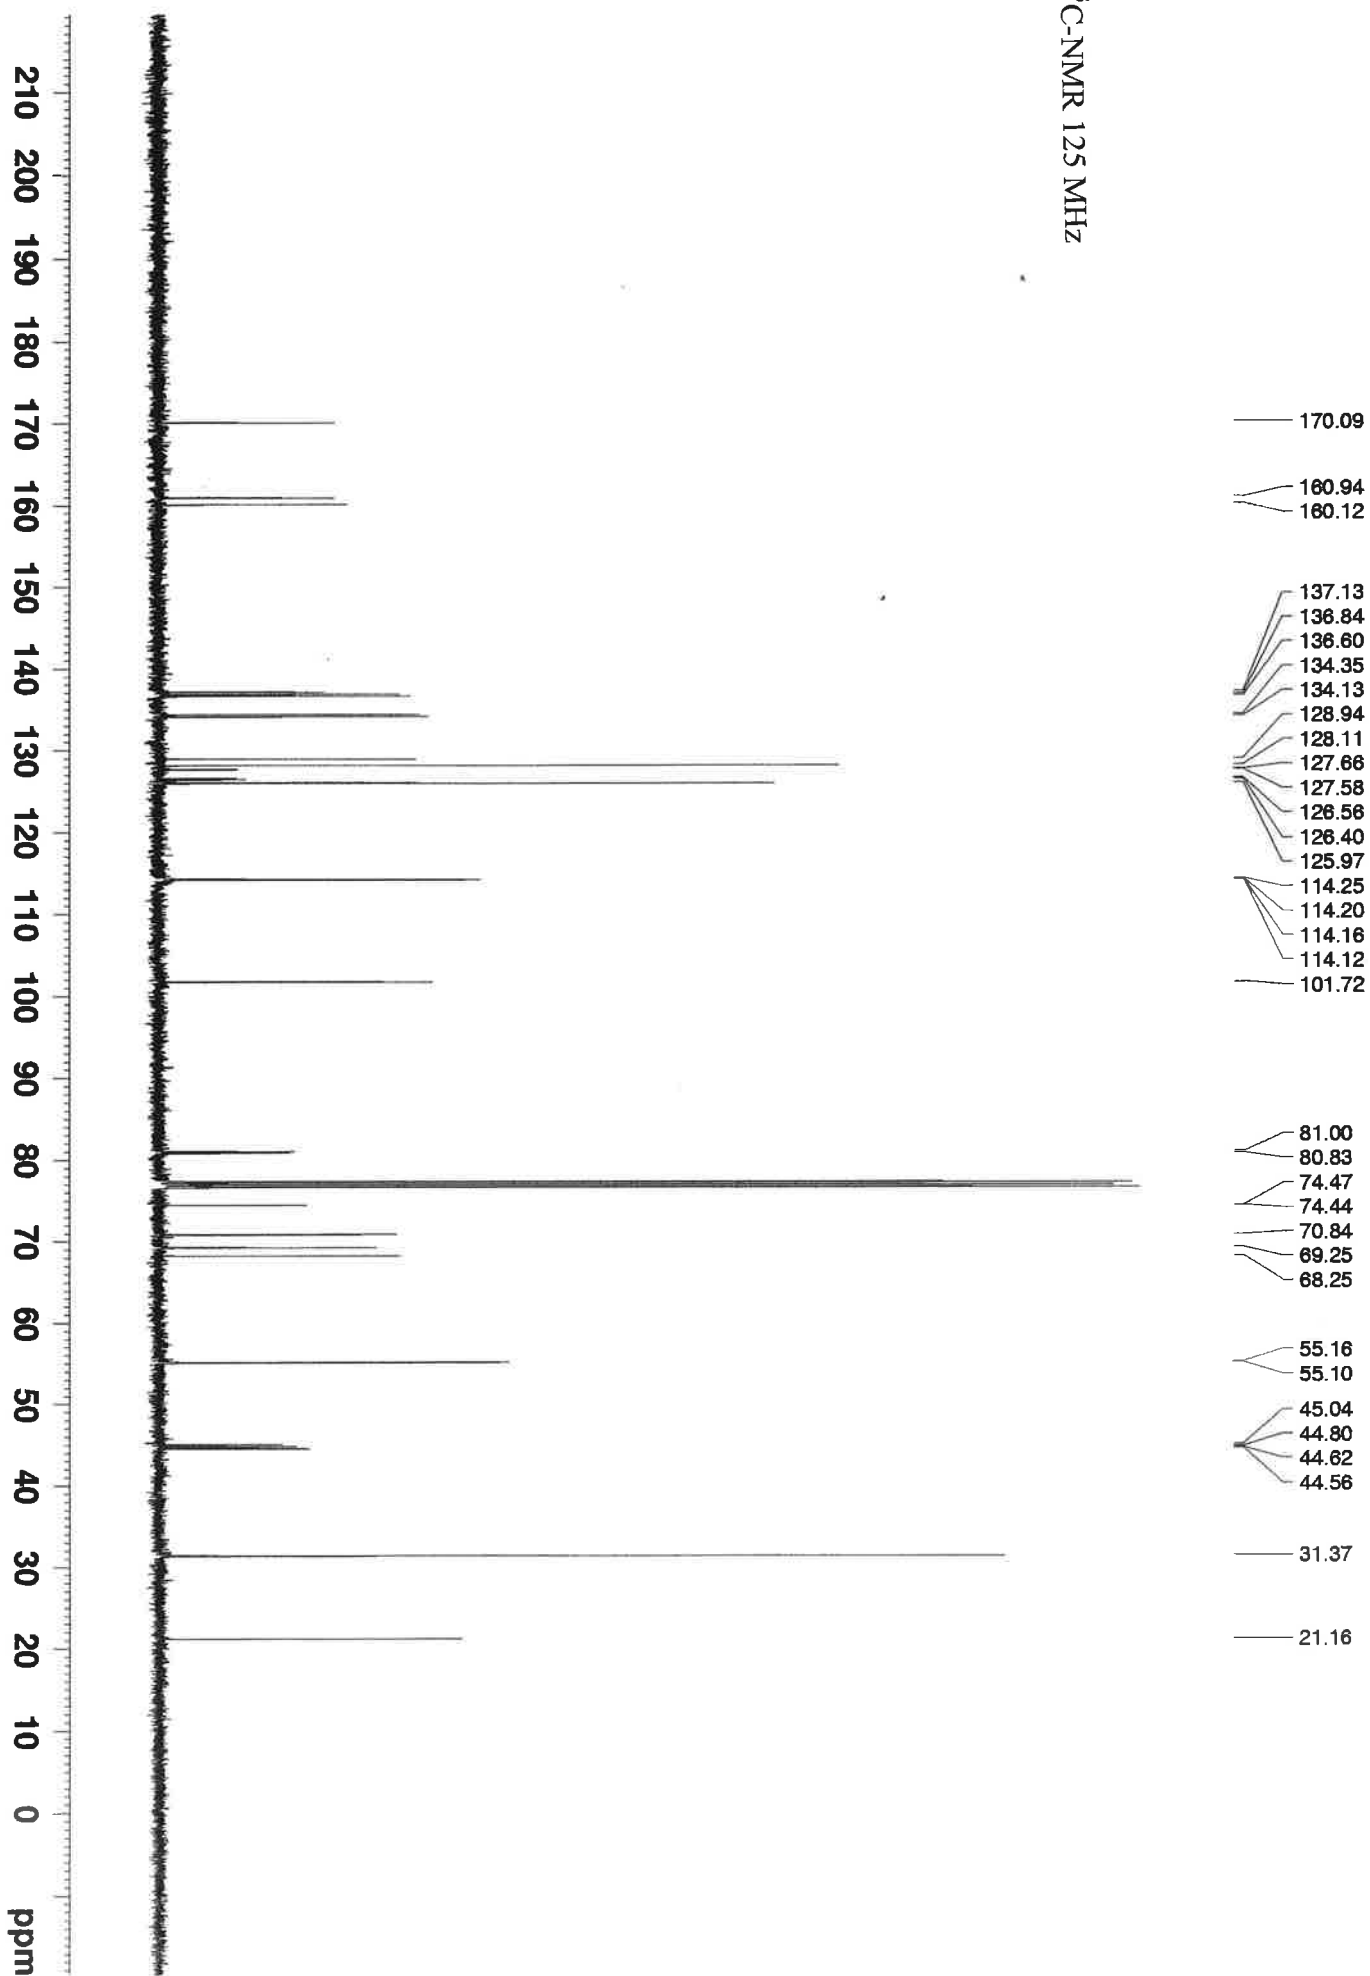

$^{31}\text{P}$ -NMR 121.4 MHz

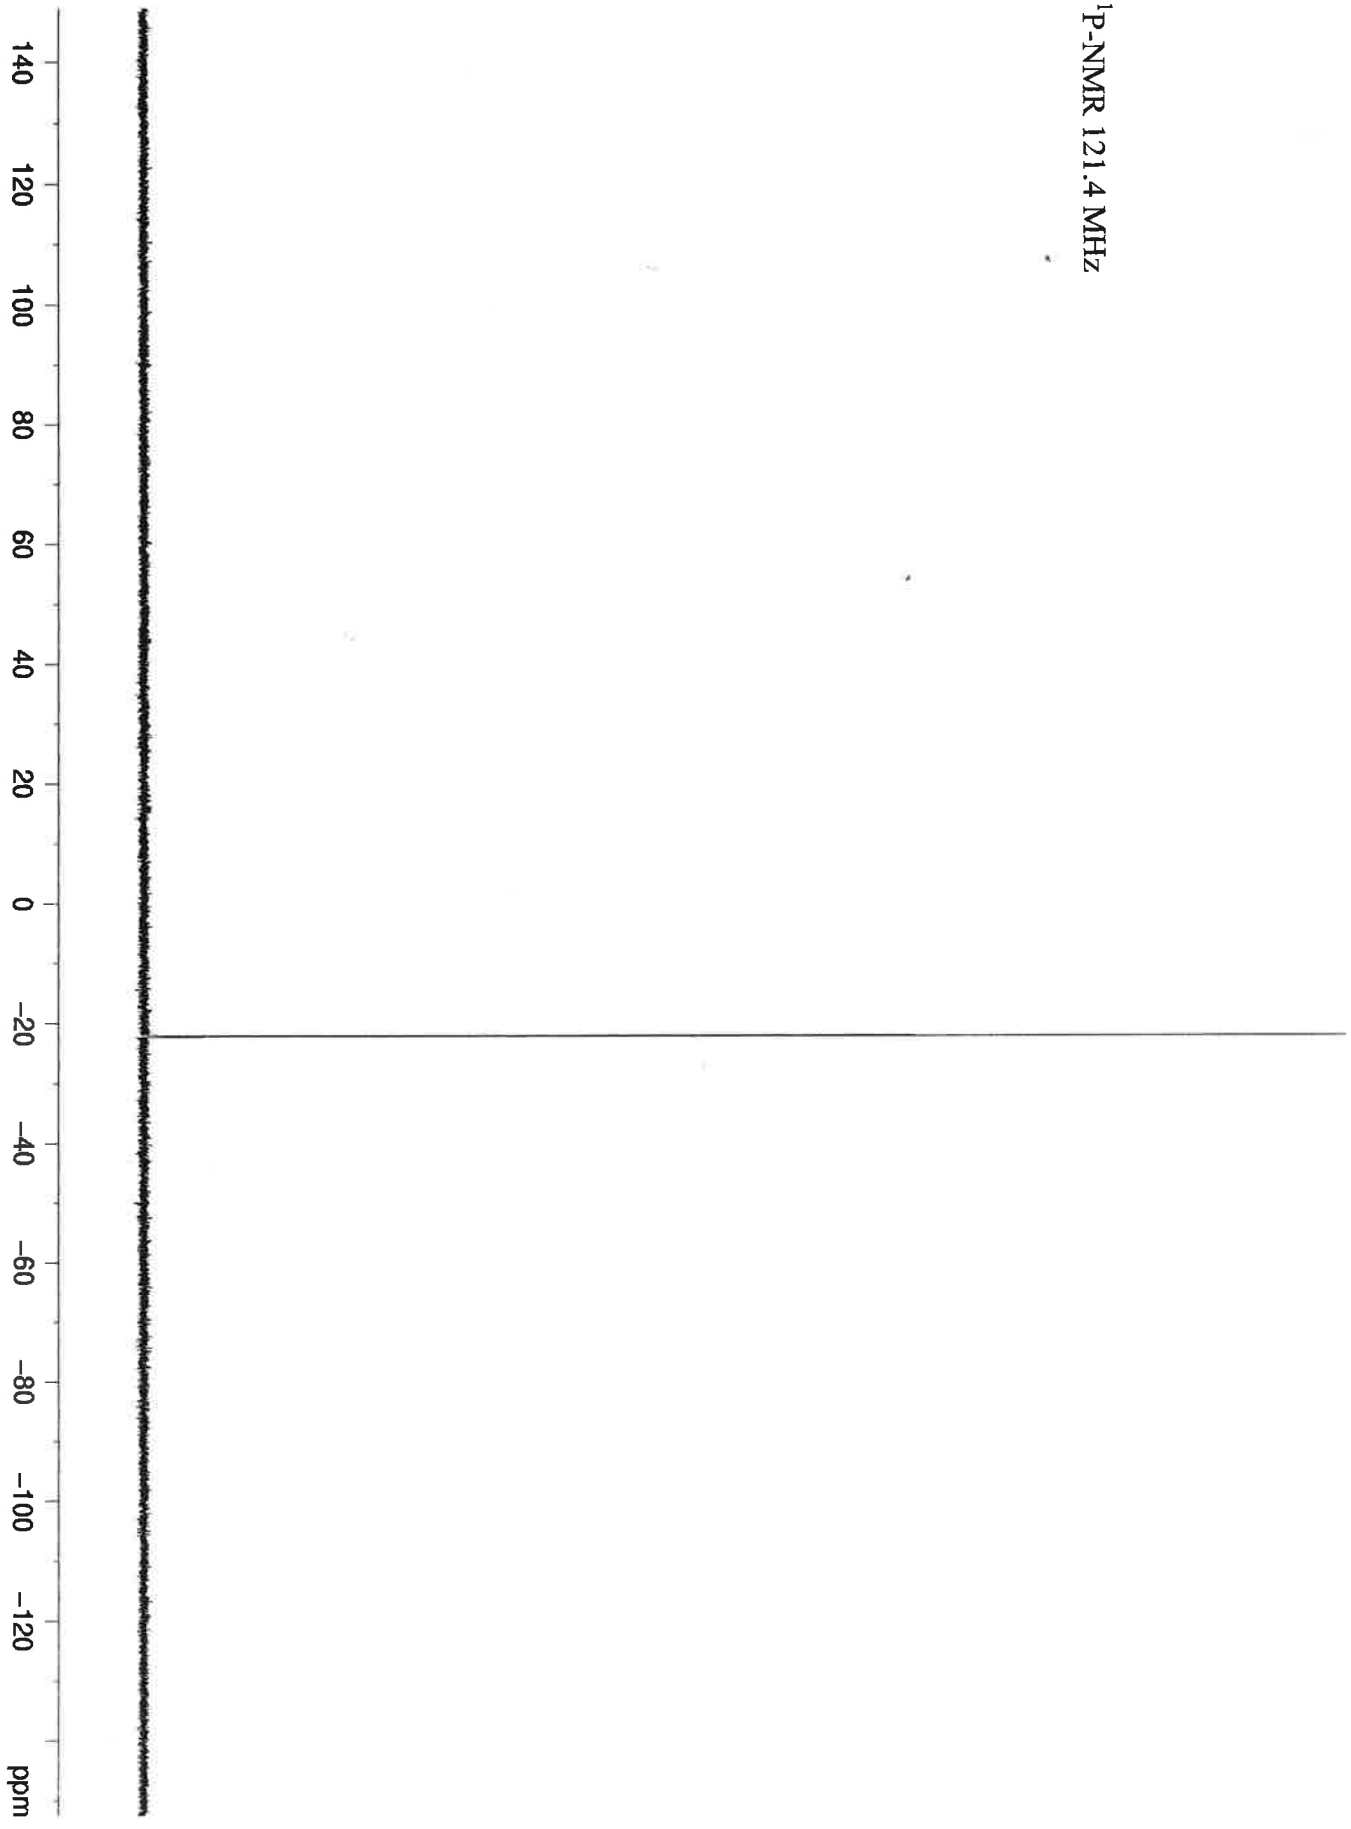

<sup>1</sup>H-NMR 500 MHz

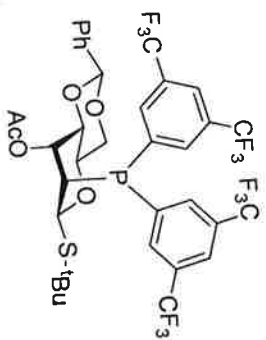

16

5.5 5.4 5.3 5.2 5.1 5.0 4.9 4.8 4.7 4.6 4.5 4.4 4.3 4.2 4.1 4.0 3.9 3.8 3.7 3.6 3.5 3.4 ppm

8.186  
8.144  
8.130  
7.947  
7.891  
7.330  
7.262  
5.612  
5.522  
5.483  
5.293  
4.985  
4.327  
4.318  
4.306  
4.297  
4.110  
4.091  
4.081  
4.072  
4.062  
4.038  
4.026  
3.687  
3.667  
3.646  
3.558  
3.539  
3.390  
2.312  
2.216  
2.191  
2.053  
2.048  
1.810  
1.612  
1.597  
1.543  
1.376  
1.360  
1.345  
1.315  
1.274  
1.261  
1.209  
0.937  
0.923  
0.909  
0.896  
0.882

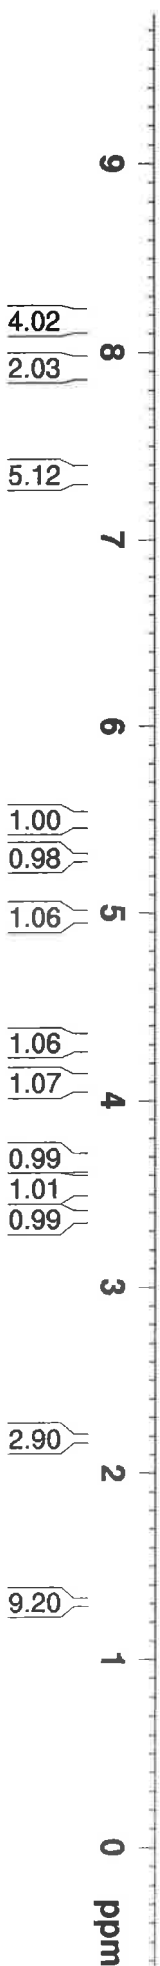

$^3\text{P}$ -NMR 121.4 MHz

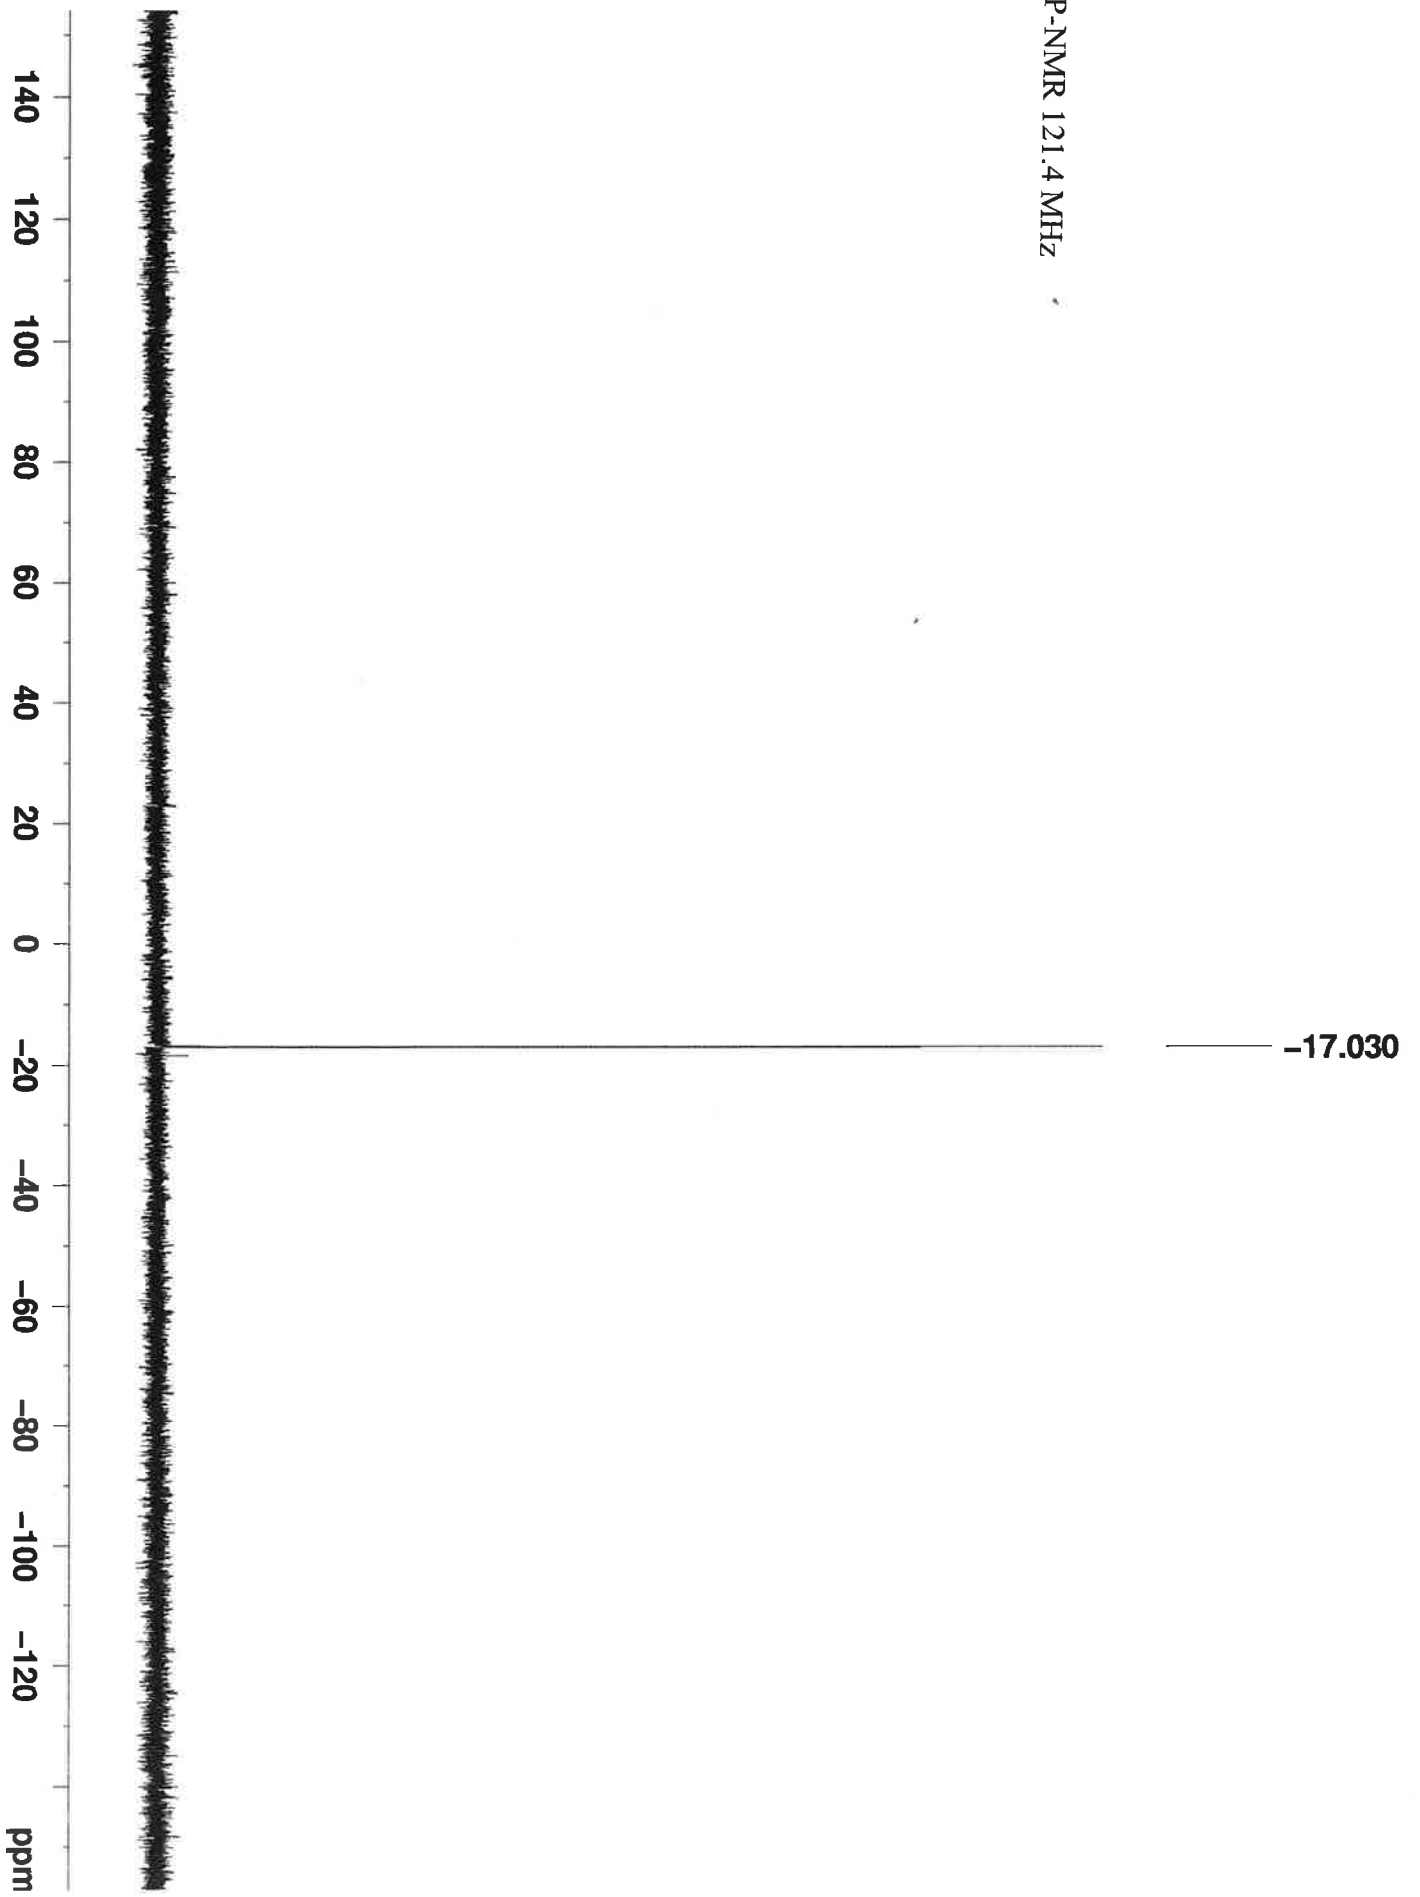

<sup>1</sup>H-NMR 500 MHz

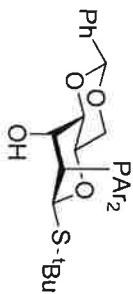

17 Ar = 2,4,6-trimethyl-C<sub>6</sub>H<sub>3</sub>

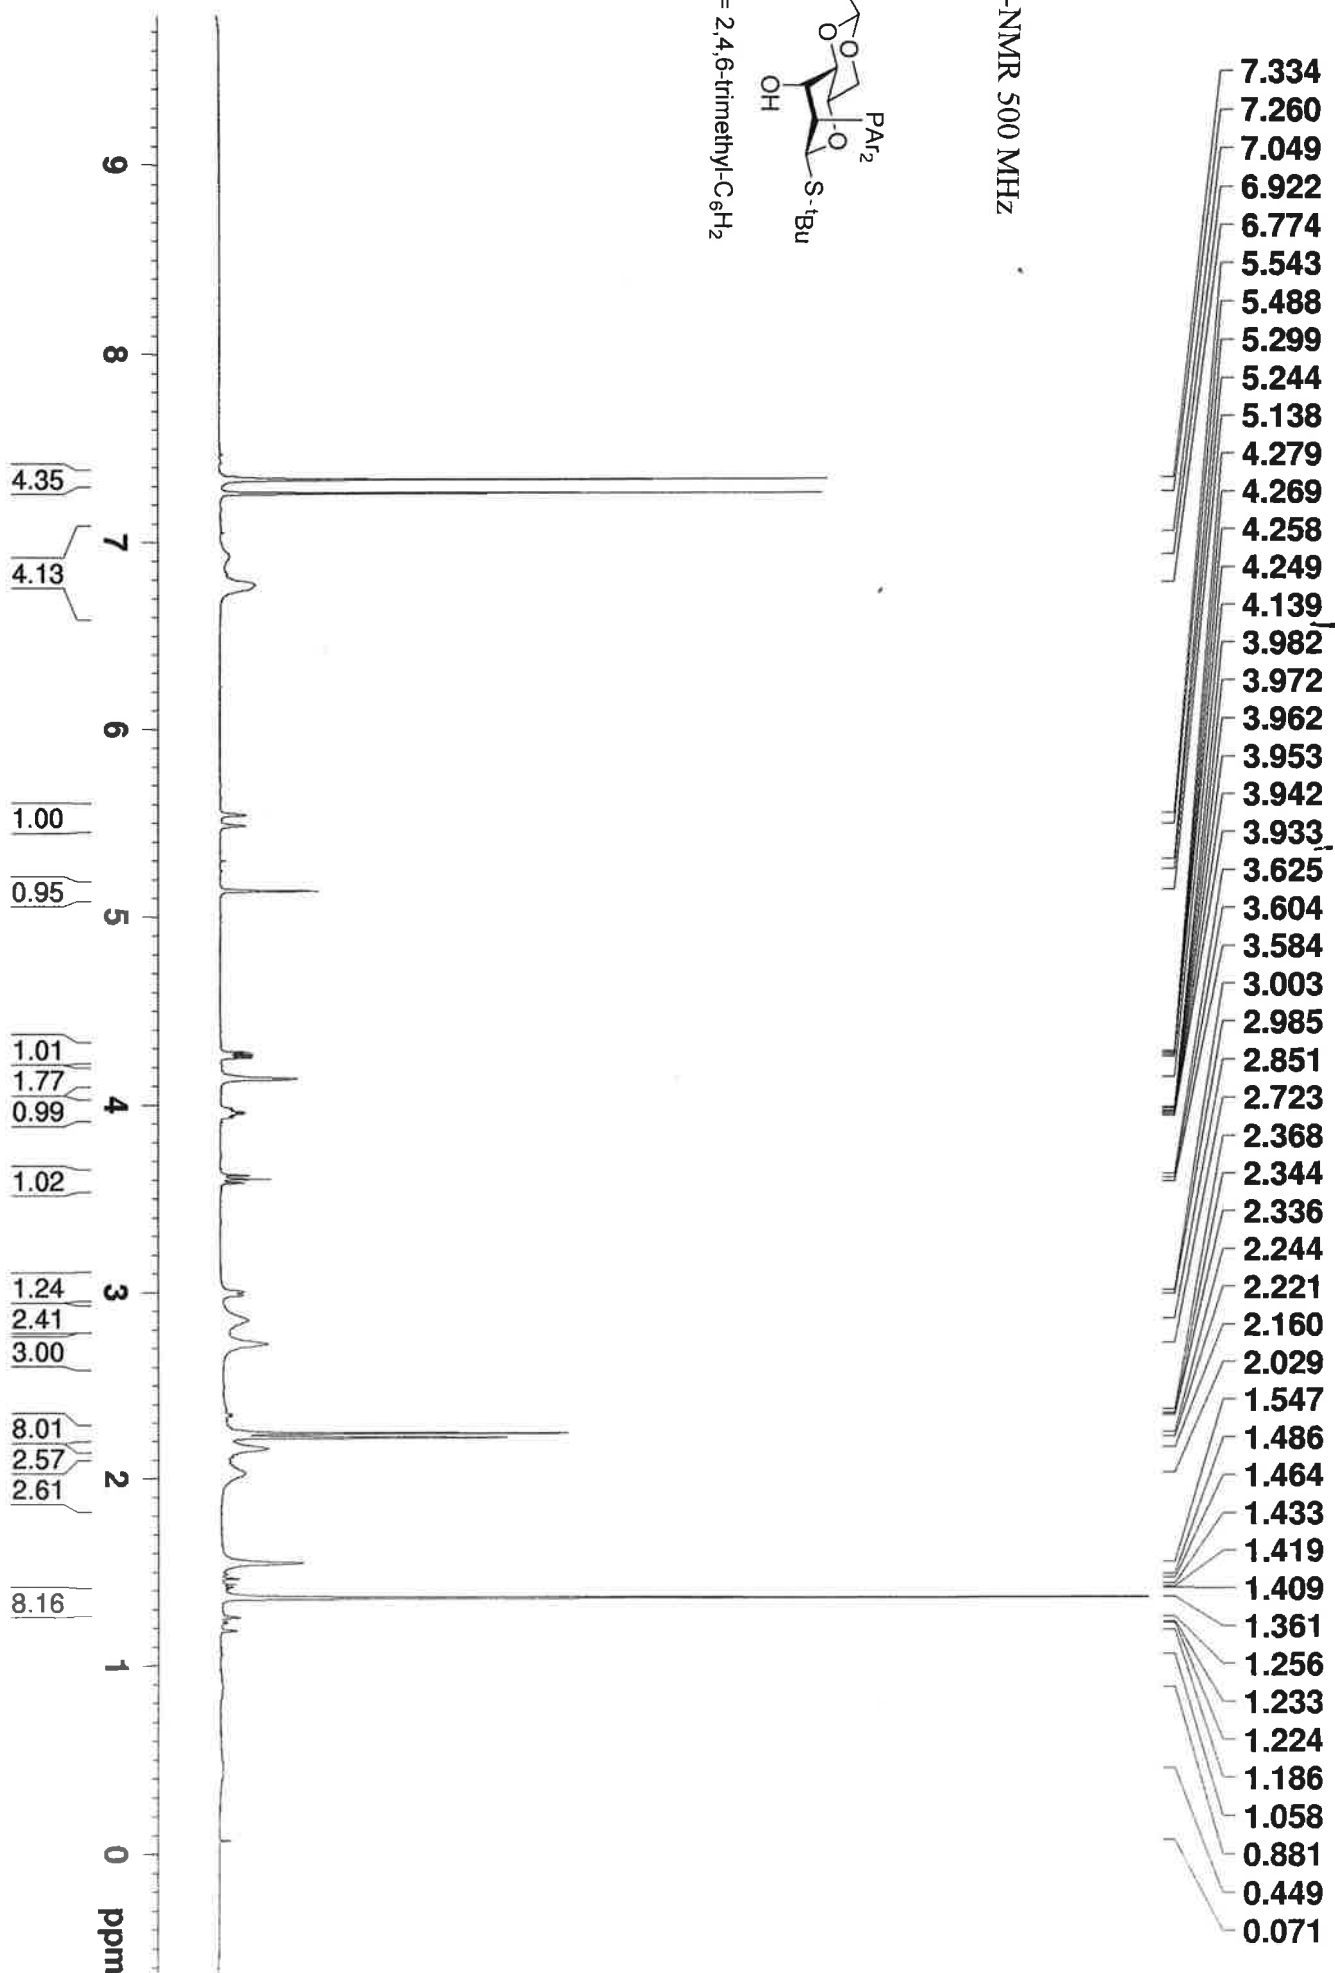



$^3\text{P}$ -NMR 121.4 MHz

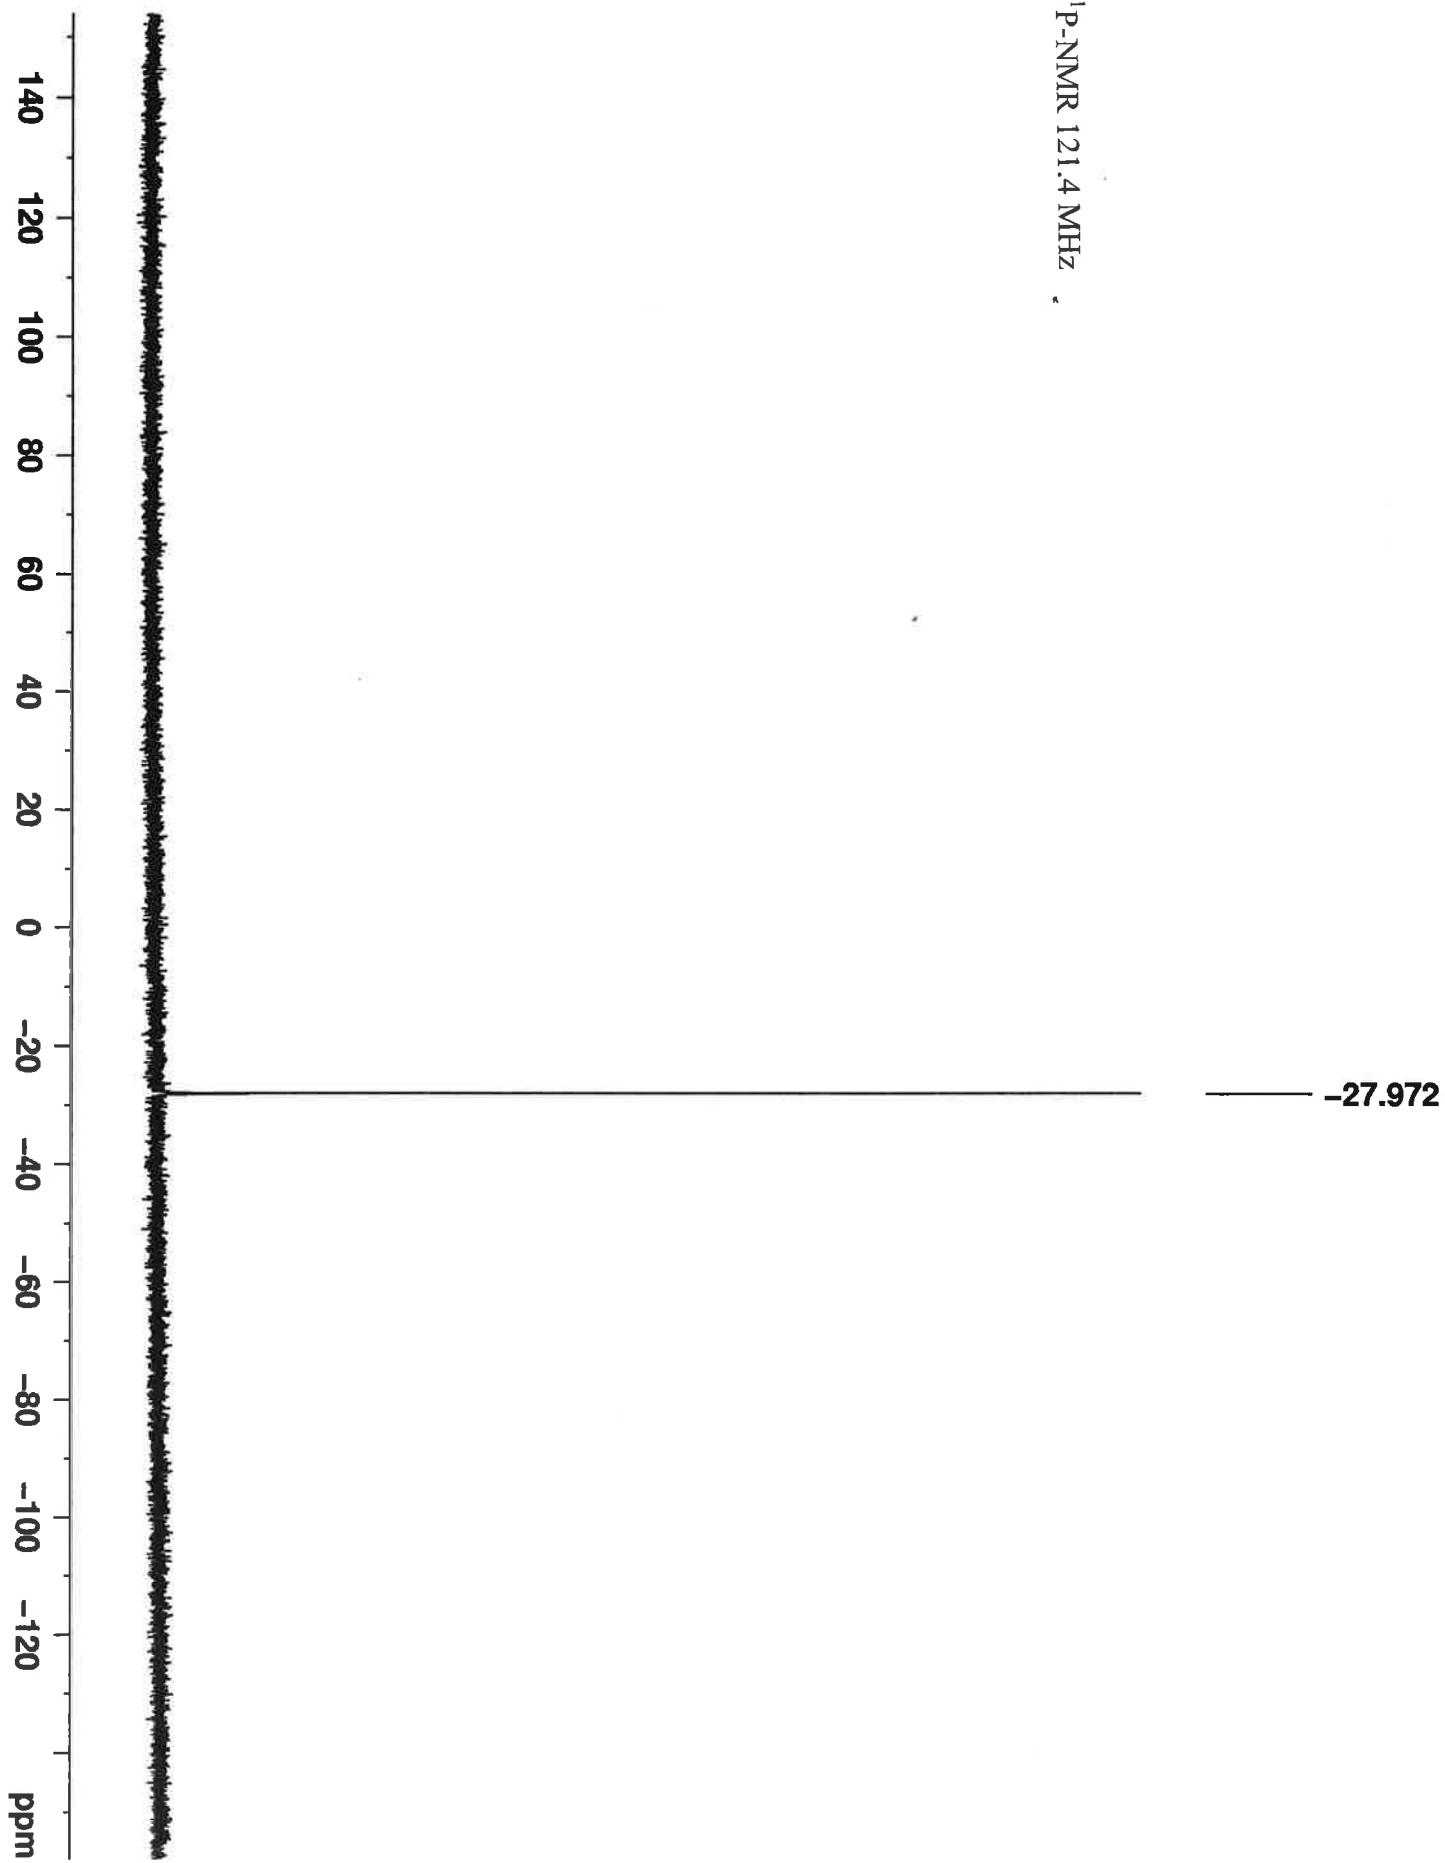

<sup>1</sup>H-NMR 500 MHz

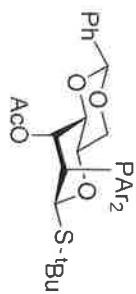

**18** Ar = 2,4,6-trimethyl-C<sub>6</sub>H<sub>2</sub>

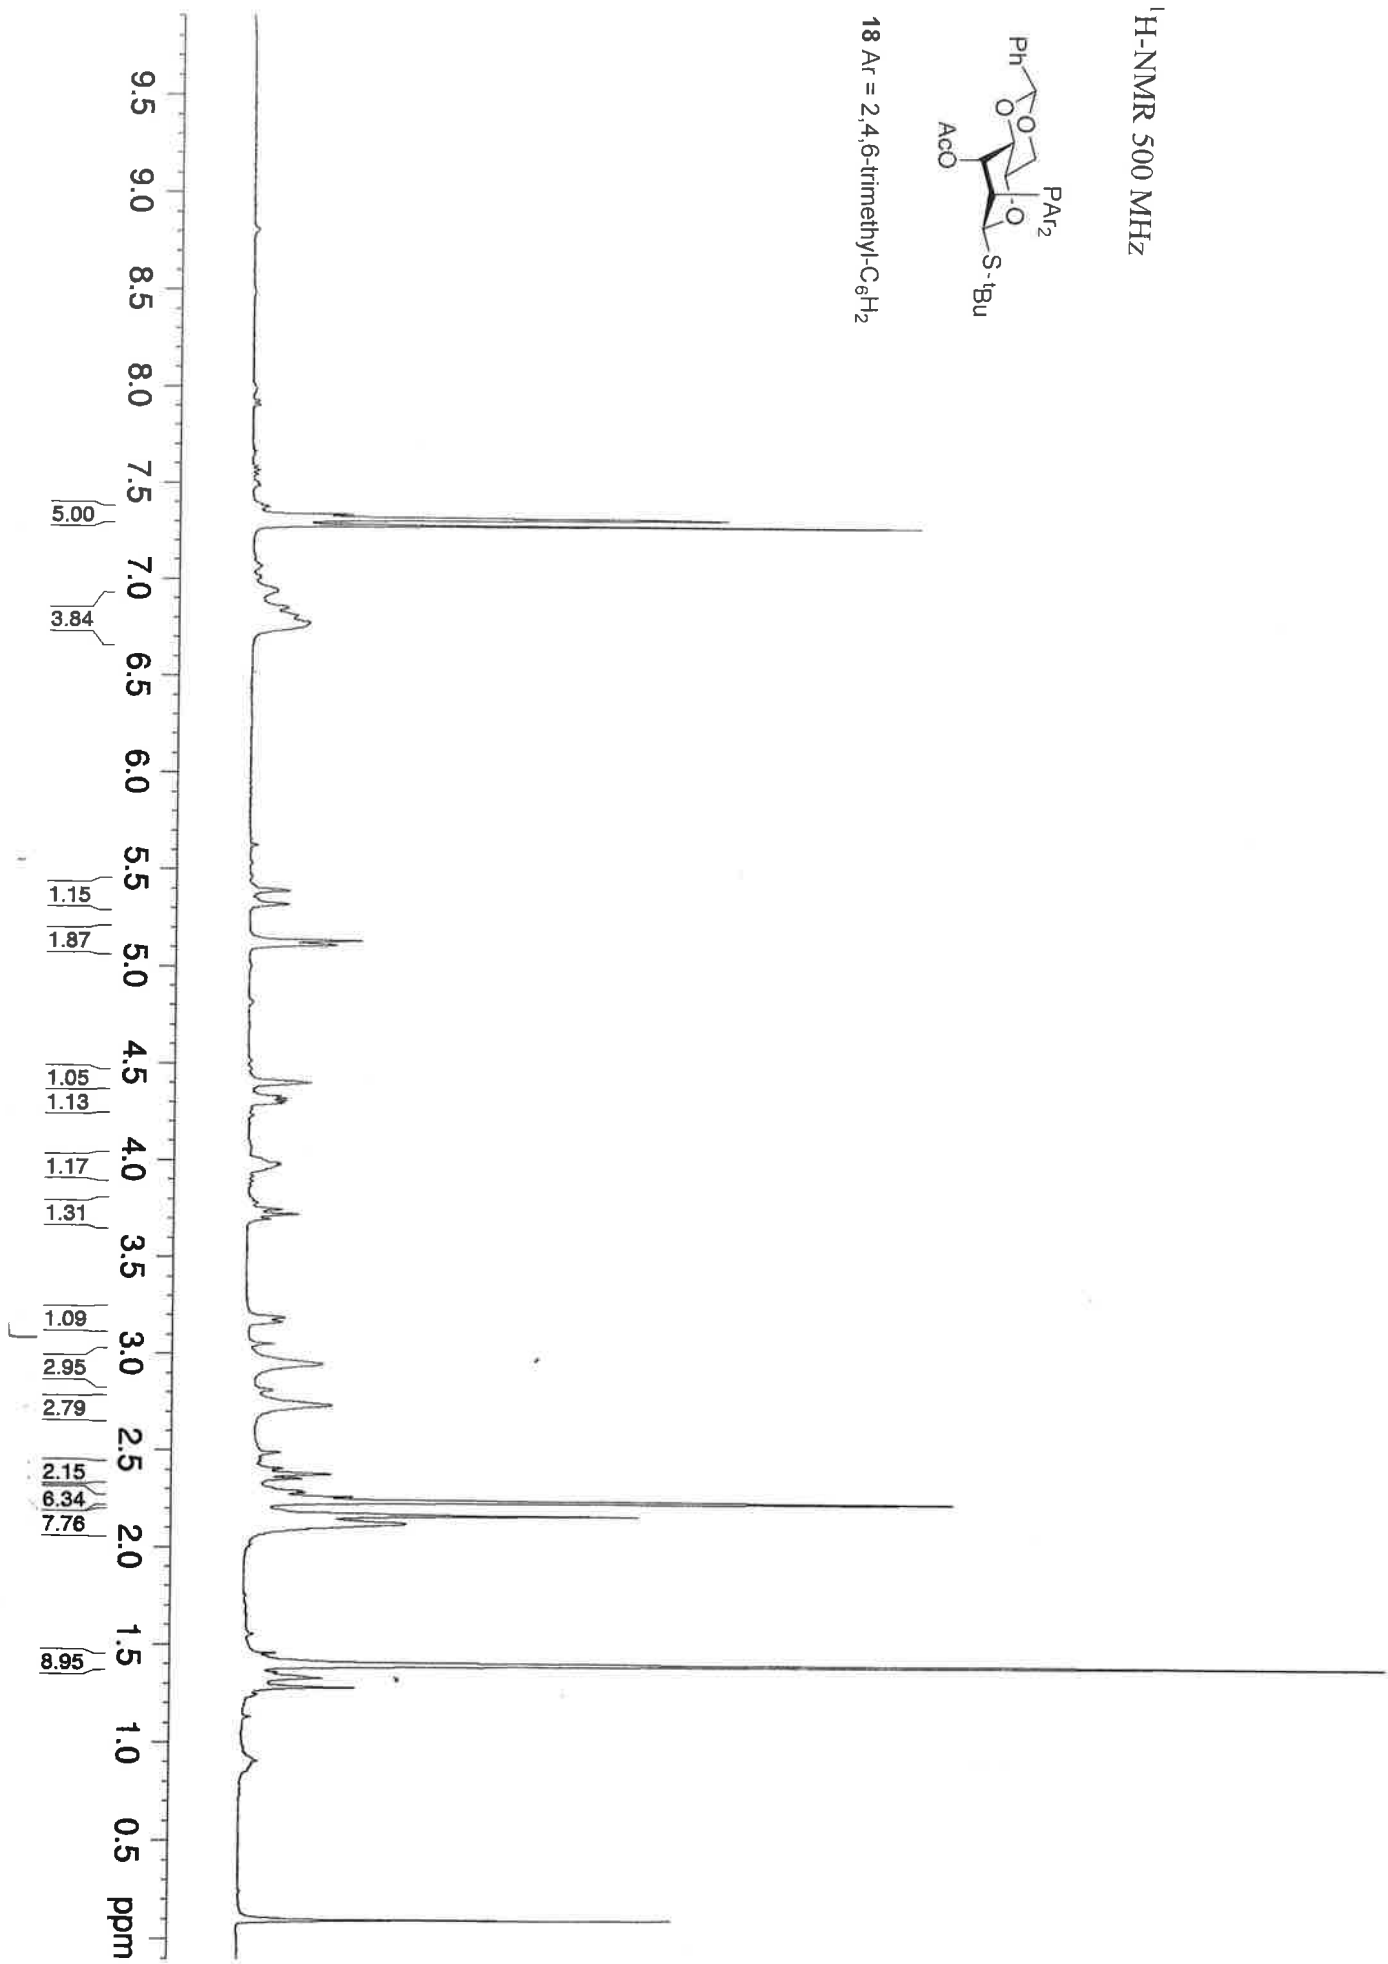

$^{13}\text{C-NMR}$  125 MHz

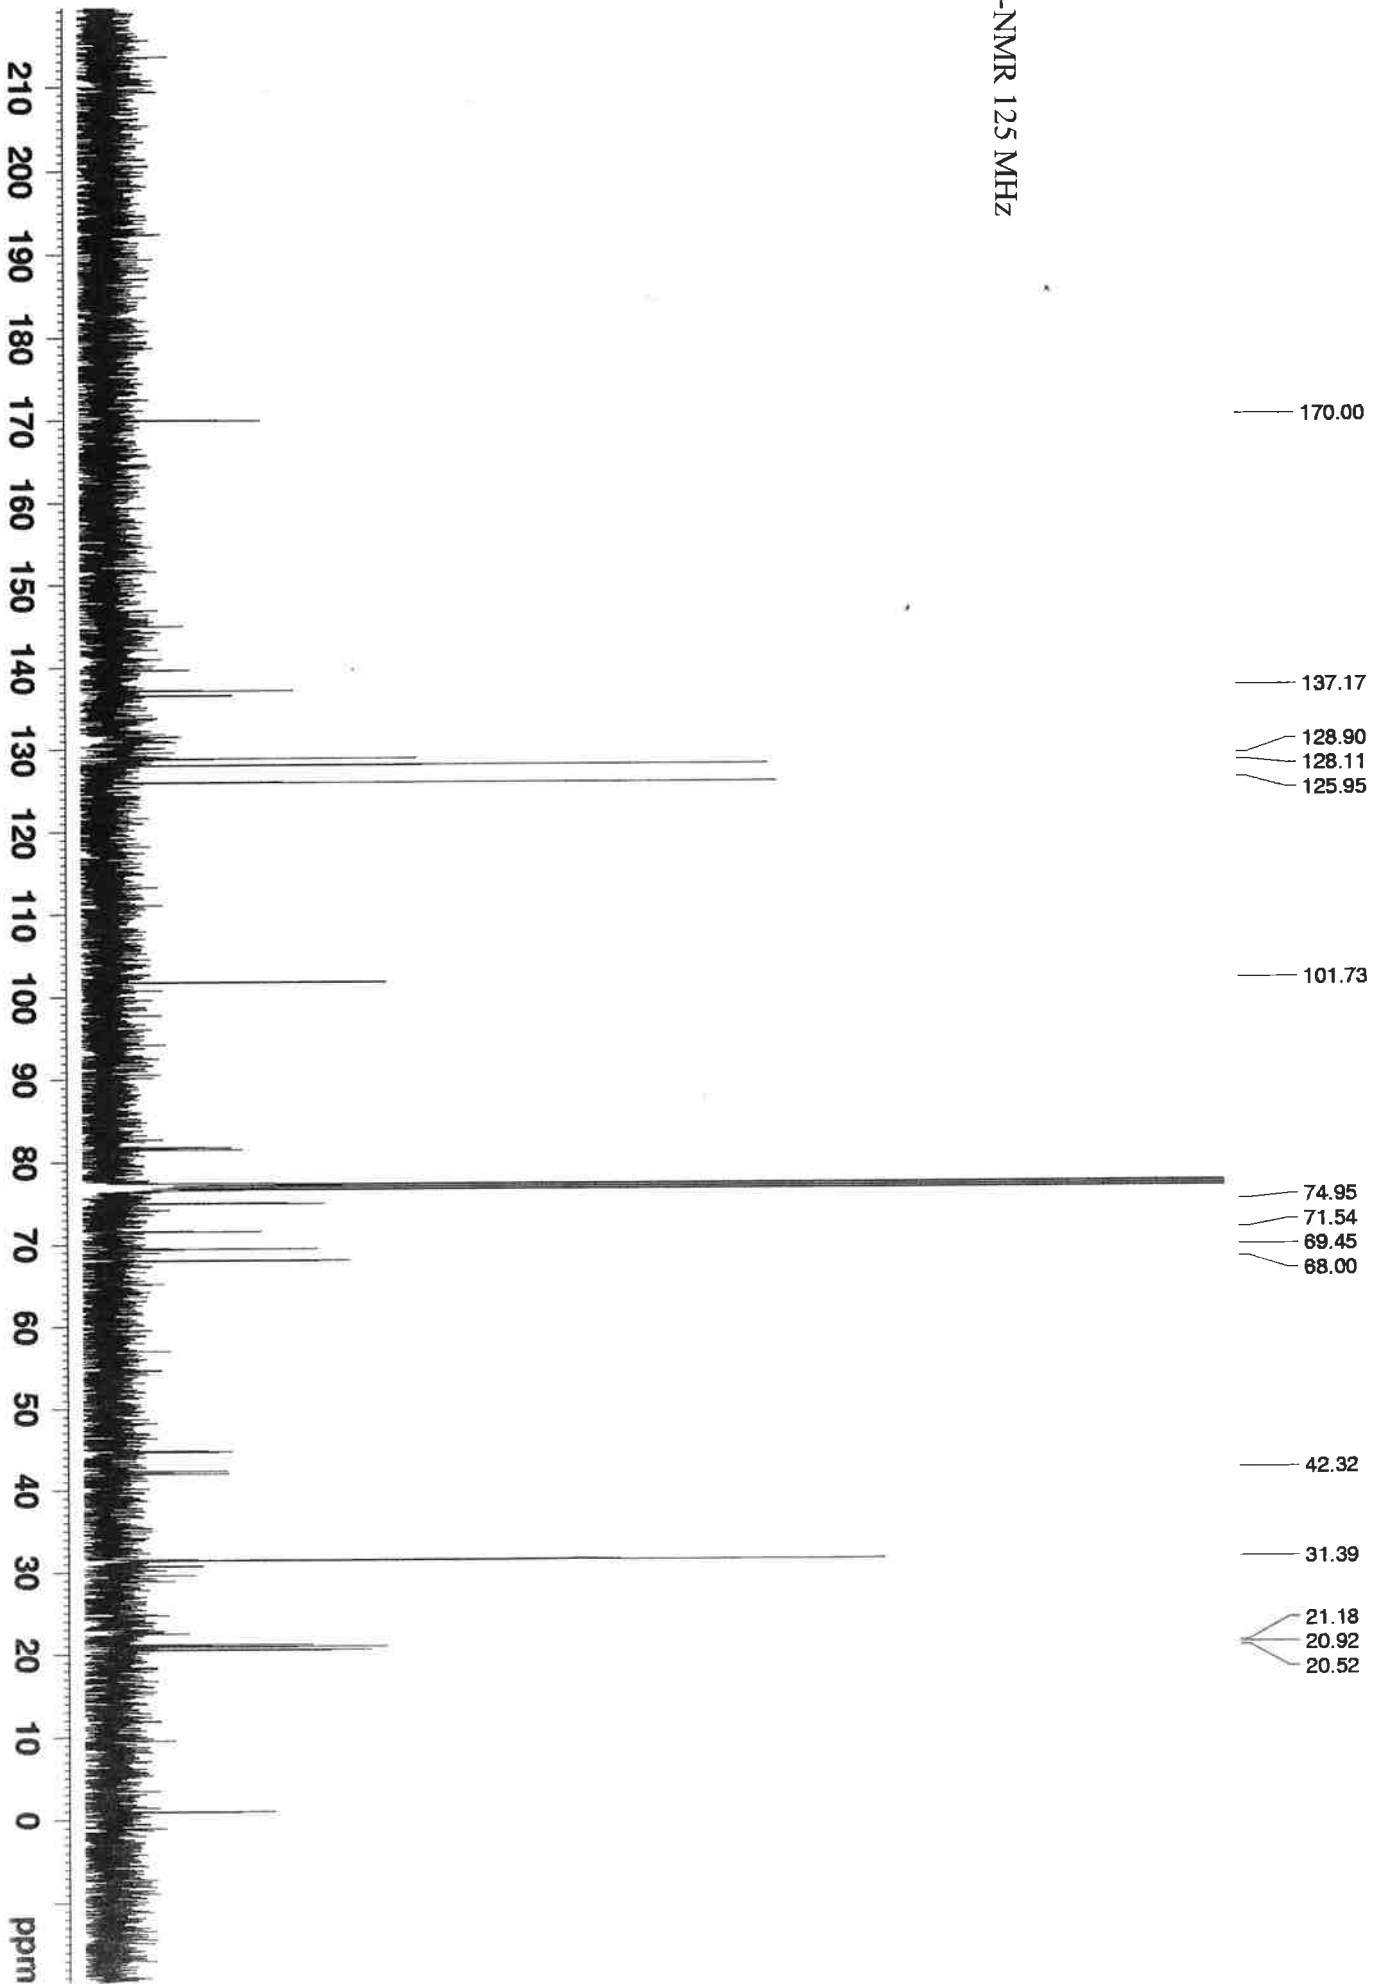

$^3\text{P}$ -NMR 121.4 MHz

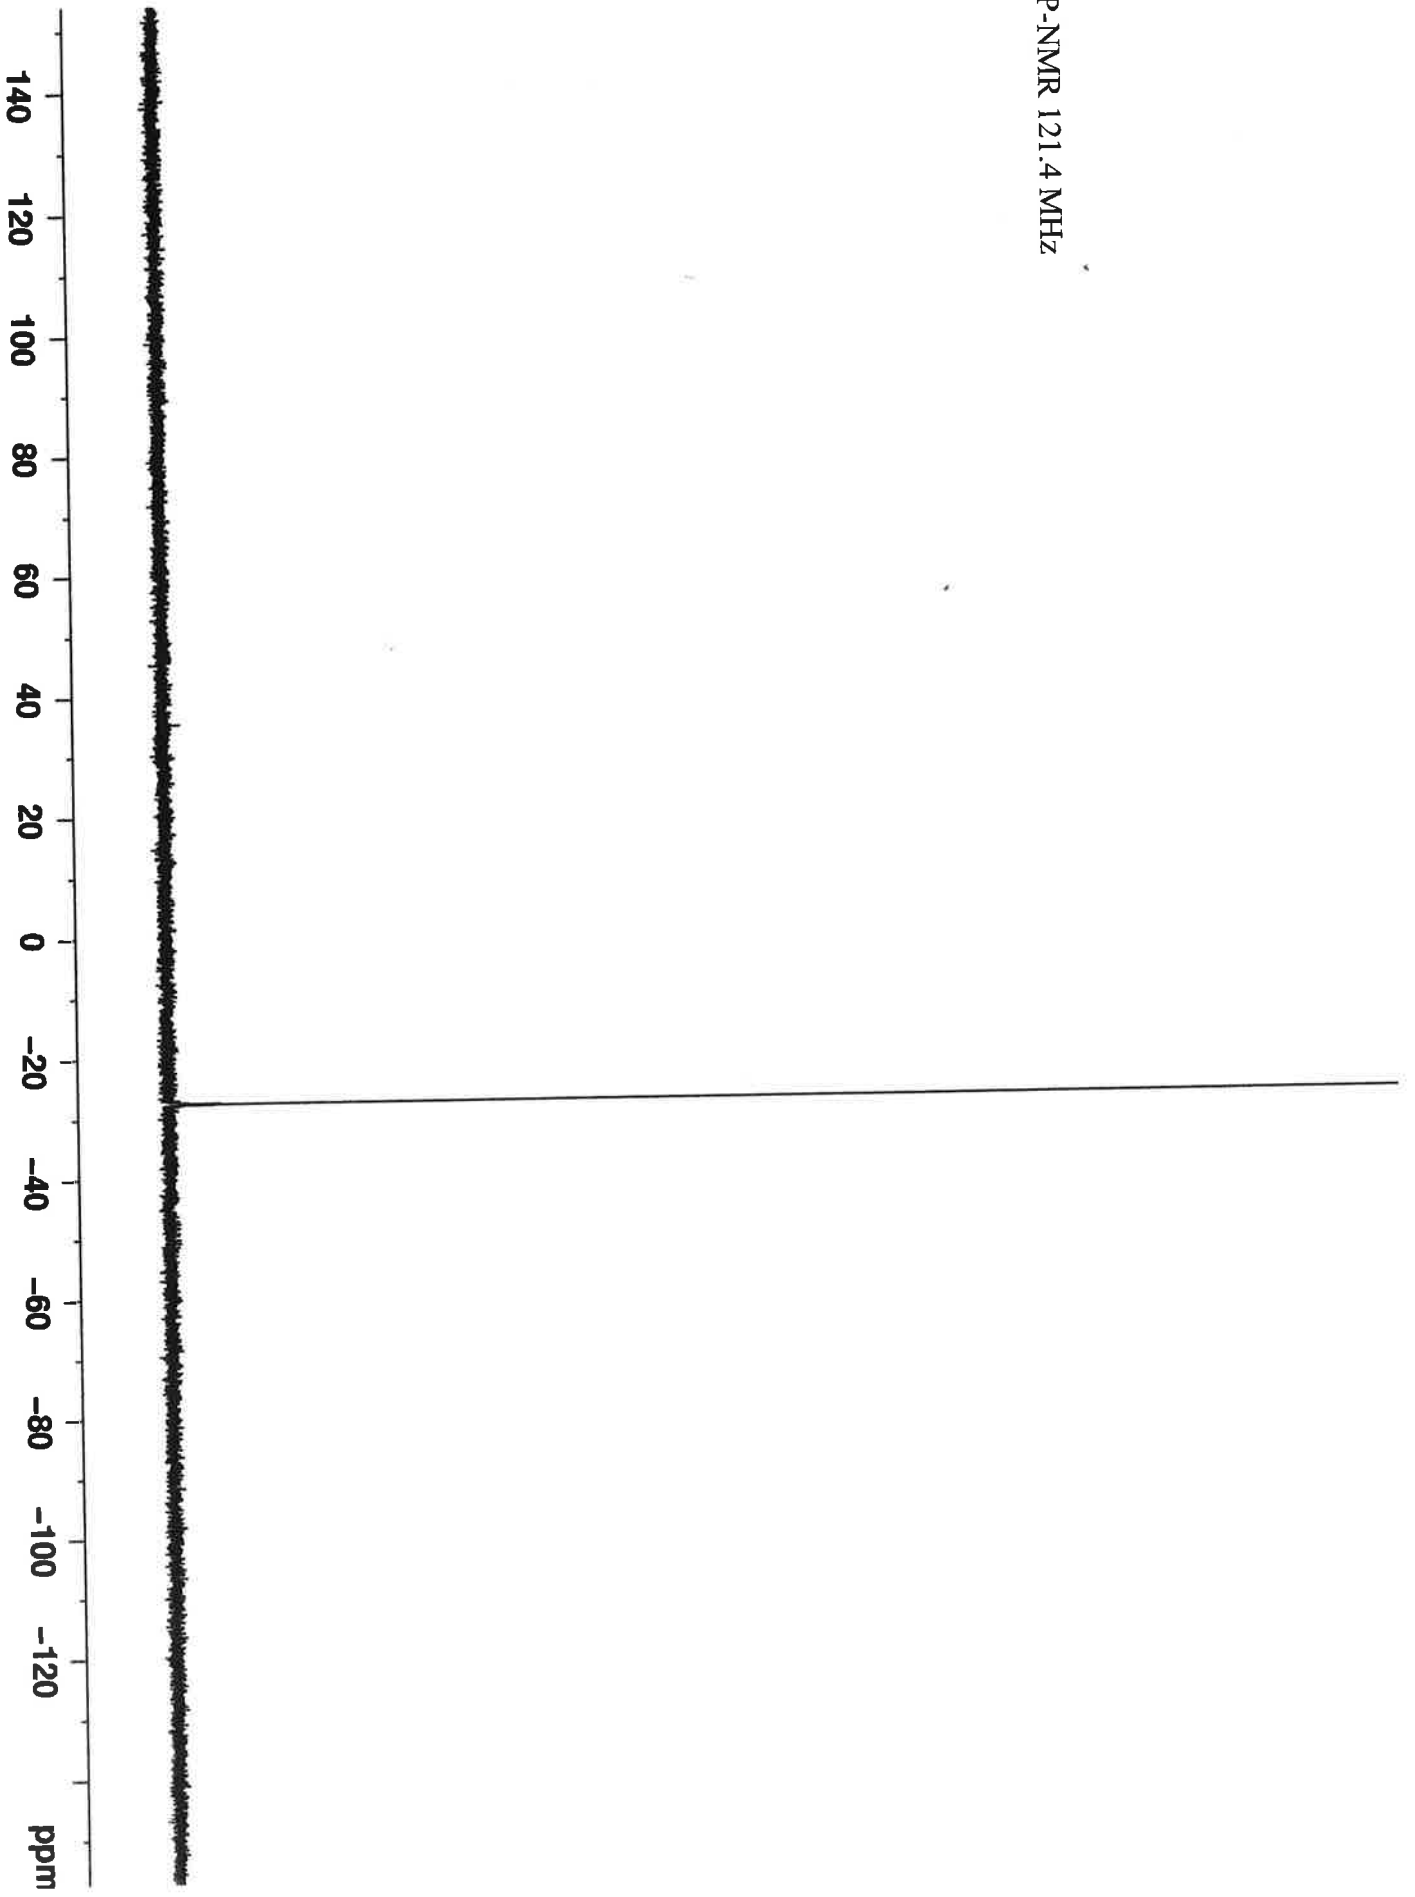

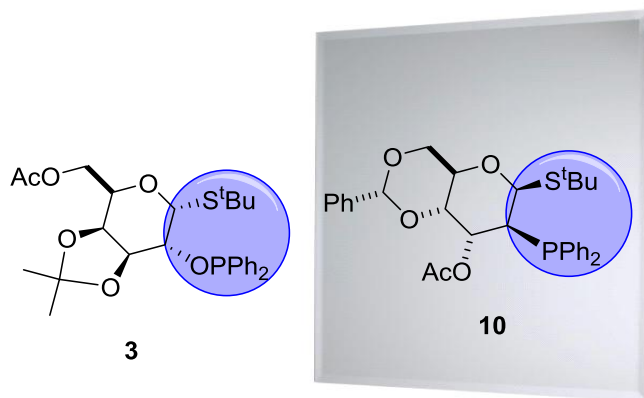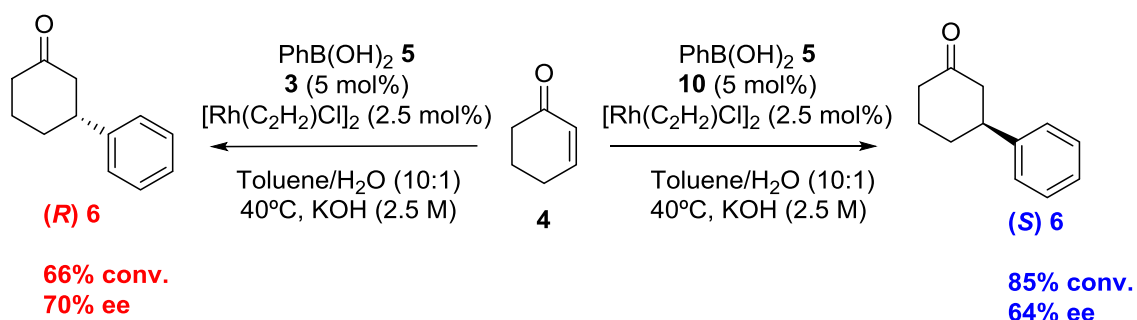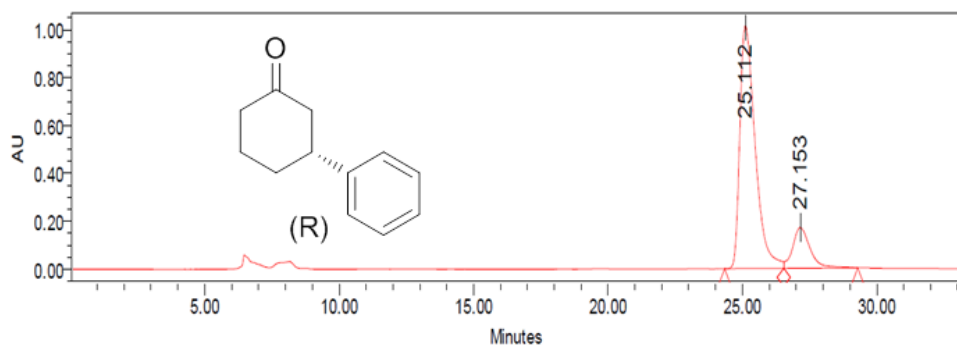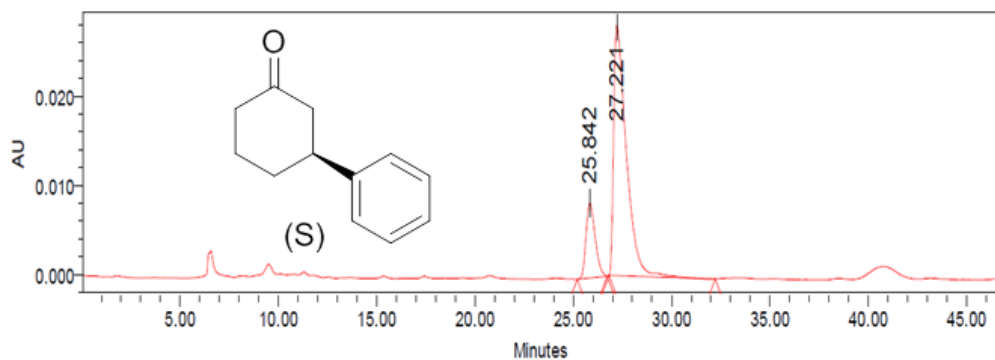

Supplement: c5ra10181f1.pdf [file c5ra10181f1.pdf]
